1 For: PLoS One

2

3

4 Queen and king recognition in the subterranean termite,  
5 *Reticulitermes flavipes*: Evidence for royal recognition pheromones

6

7 Colin F. Funaro<sup>1,#a\*</sup>, Coby Schal<sup>1</sup>, Edward L. Vargo<sup>2</sup>

8

9

10

11 <sup>1</sup> Department of Entomology and Plant Pathology, North Carolina State University, Raleigh,  
12 NC, USA

13 <sup>2</sup>Department of Entomology, Texas A&M University, College Station, TX, USA

14 <sup>#a</sup>Current Address: Center for Integrated Pest Management, North Carolina State University,  
15 Raleigh, NC, USA

16

17

18 \* Corresponding Author

19 Email: [colin.funaro@gmail.com](mailto:colin.funaro@gmail.com)

## 21 **Abstract**

22           Royal recognition is a central feature of insect societies, allowing them to maintain  
23 the reproductive division of labor and regulate colony demography. Queen recognition has  
24 been broadly demonstrated and queen recognition pheromones have been identified in social  
25 hymenopterans, and in one termite species. Here we describe behaviors that are elicited in  
26 workers and soldiers by neotenic queens and kings of the subterranean termite,  
27 *Reticulitermes flavipes*, and demonstrate the chemical basis for the behavior. Workers and  
28 soldiers readily perform a lateral or longitudinal shaking behavior upon antennal contact with  
29 queens and kings. When royal cuticular chemicals are transferred to live workers or inert  
30 glass dummies, they elicit antennation and shaking in a dose-dependent manner. The striking  
31 response to reproductives and their cuticular extracts suggests that royal-specific cuticular  
32 compounds act as recognition pheromones and that shaking behavior is a clear and  
33 measurable queen and king recognition response in this termite species.

34

## 35 **Introduction**

36 Social insects rely on chemical communication to function effectively; within the  
37 colony, pheromones mediate foraging, aggregation, defense, reproduction, and other essential  
38 processes [1,2]. Recognizing reproductive castes (queens in social hymenopterans, queens  
39 and kings in termites) is especially important to preserve the royal-worker division of labor  
40 and to ensure proper care for these high-value individuals. Royal pheromones and  
41 recognition behaviors have been well studied in ants, bees, and wasps, but have received  
42 little attention in termites. Pheromones largely mediate and guide the behavior and  
43 physiology of sterile castes in social hymenopteran colonies, with some notable exceptions  
44 that include visual signals and tactile/physical interactions [3–5]. Pheromones in general and  
45 more specifically royal (usually queen) pheromones are generally classified into those that  
46 elicit immediate behaviors (releaser pheromones) and those that induce long-term  
47 physiological changes in sterile worker castes (primer pheromones). Identifying these  
48 compounds and elucidating their effects and glandular origins have received increasing  
49 attention in social insect biology.

50 Distantly related to the social Hymenoptera, termites share life history traits and  
51 ecologically important roles with ants, bees, and wasps. Termites tend to exhibit a more  
52 flexible developmental pathway than their hymenopteran counterparts, as most individuals in  
53 colonies of many lower termites, including subterranean termites (Blattodea: Isoptera:  
54 Rhinotermitidae), retain the ability to develop gonads and molt into functional worker-  
55 derived reproductives called neotenics [6,7]. Neotenics can also develop from nymphs that

56 normally develop into winged primary reproductives. Active queens and kings inhibit  
57 reproductive development in other colony members and most likely use chemical signals to  
58 do so. Additionally, because reproductively active males (kings) stay within the nest, termites  
59 appear to employ both queen- and king-specific pheromones to preserve the reproductive  
60 division of labor in each sex and elicit care from workers [8–10].

61         The first termite queen primer pheromone was identified in the Japanese subterranean  
62 termite (*Reticulitermes speratus*) as a blend of two highly volatile compounds—2-methyl-1-  
63 butanol and n-butyl-n-butyrate—which inhibit the reproductive differentiation of female  
64 workers and nymphs into supplementary reproductives [10]. Although reproductive-specific  
65 volatile compounds and long-chain hydrocarbons have been found in *Nasutitermes*  
66 *takasagoensis* and *Zootermopsis nevadensis*, respectively, their functions have not been  
67 evaluated [11,12]. Thus, only one releaser pheromone involved in royal recognition has  
68 recently been described in termites [13]. It is possible that the search for these compounds  
69 has been impeded by the rarity and fragility of termite reproductives, the paucity of termite  
70 researchers, or the lack of robust bioassays to measure the physiological or behavioral effects  
71 of presumptive queen and king pheromones.

72         Foundational work on queen-recognition in bees and fire ants involves ketones,  
73 esters, alcohols, and fatty acids [14,15]. However, queens from a number of other social  
74 hymenopteran species possess unique cuticular hydrocarbons (CHCs) that correlate with  
75 ovary activation and often elicit queen recognition [16–18]. CHCs are the dominant class of  
76 most insects' cuticular lipid layer and help to prevent desiccation and act as a barrier against  
77 pathogens. Also known to be important cues in nestmate and interspecific recognition in both

78 solitary and social species, CHCs are highly variable and responsive to different  
79 physiological and environmental inputs [19]. CHCs are thus hypothesized to have been co-  
80 opted over the course of evolution as reliable signals for mate recognition and fertility  
81 because of the relationship between their composition and the insect's physiology and  
82 metabolism [17,20].

83         Cuticular hydrocarbons also show promise as termite royal recognition pheromones.  
84 They have been found to be involved in caste- and species-recognition, especially within the  
85 subterranean termites [21–25]. The literature remains divided on the role of CHCs in  
86 recognition and aggression, but it is generally held that CHC blends are important in  
87 mediating behavior and agonistic interactions in certain termite species [26,27]. Indeed, the  
88 only royal recognition pheromone, recently identified in the subterranean termite  
89 *Reticulitermes flavipes*, is a CHC [13].

90         Pivotal to the identification of royal-recognition pheromones are behavioral assays  
91 that can be used to test worker responses to queens and kings. Yet, queen and king  
92 recognition behaviors have not been well described in termites, and there is no clear retinue  
93 response around reproductive individuals, as commonly observed in the Hymenoptera  
94 [15,28–30]. Aggressive intracolony interactions establishing reproductive dominance have  
95 been described and are loosely related to queen recognition, but it is unclear whether a  
96 chemical signal is involved [31,32]. Behaviors such as head-butting, tremulations, jerking,  
97 and oscillatory behavior have been described in several termite species, but never in relation  
98 to reproductive individuals [33–37].

99           Upon observing a distinct oscillatory/shaking behavior in workers of *R. flavipes* in  
100 close proximity to primary and neotenic queens and kings, we hypothesized that this might  
101 represent a royal recognition response. To complement a growing literature describing queen  
102 fertility and recognition signals in social Hymenoptera and to understand the mechanisms  
103 underlying royal recognition in termites, we investigated behavioral responses of workers to  
104 queens and kings of *R. flavipes* and the chemical signals that elicit them.

105

## 106 **Methods and Materials**

107

### 108 **Termite collection**

109           Colonies of *Reticulitermes flavipes* were collected as needed in Raleigh, North  
110 Carolina, from three wooded locations (Carl Alwin Schenck Memorial Forest, 35.48 N,  
111 78.43 W, under the authority of Elizabeth Snider; Historic Yates Mill County Park, 35.43 N,  
112 78.41 W, under the authority of Timothy Lisk; and Lake Johnson Park, 35.45 N, 78.42 W)  
113 between 2010 and 2015. Lake Johnson Park is managed by the city of Raleigh and requires  
114 no specific permissions for termite collection and none of our collections involved  
115 endangered or protected species at any collecting site. Although colonies could be  
116 maintained for long periods of time and successfully reproduced in the lab, they tended to  
117 slowly lose their vitality and needed to be replaced. Additionally, primary queens and kings  
118 were rarely found, and colonies were most likely not collected in their entirety because of the  
119 many spatially separated chambers typical of *R. flavipes* colonies. For each assay, specific

120 colonies and their collection site are noted in the methods below. All termite colonies were  
121 maintained in laboratory conditions for ~6 months before use, with the exception that the  
122 initial behavioral assays used colonies from Schenck Forest maintained for ~11 months in the  
123 lab. Whole tree limbs or logs with termites were split into smaller pieces and set out in  
124 shallow pans to dry. Using either plastic container lids with moist paper towels underneath or  
125 ~10 cm PVC pipes containing coils of moistened corrugated cardboard, the termites  
126 passively moved out of the drying wood and into the moist substrate. Fully extracted colonies  
127 were kept either in clear plastic boxes lined with moist sand and pine shims for food or in 9-  
128 cm petri dishes with an autoclaved lab substrate consisting of 70% sawdust and 30%  $\alpha$ -  
129 cellulose. Colonies were maintained in opaque plastic containers in a ~24°C incubator under  
130 14:10 L:D cycle with lights-on at 0600.

131

## 132 **Production of secondary reproductives**

133 Shaking behavior in response to royal castes was initially observed in primary, colony  
134 founding queens and kings. Because these individuals are difficult to find and *R. flavipes*  
135 readily generates replacement, or neotenic, reproductives, we used only neotenic kings and  
136 queens in our assays. To produce these individuals, colony fragments of ~2,000 to 5,000  
137 individuals were subdivided into 5 cm petri dishes without reproductives. Newly emerged  
138 neotenic typically appeared within 2–3 weeks and were removed to prevent inhibition of  
139 queen and king differentiation in the neotenic-generating dishes. Newly-emerged neotenic  
140 were then held in 9-cm dishes containing ~500 workers and 20–50 soldiers until used in  
141 experiments. The majority of neotenic were ergatoid (and thus apterous), although on rare

142 occasions we found nymphoid neotenic present in the colony fragments, which were  
143 identified by their wingbuds. Additionally, neotenic kings typically differentiated one at a  
144 time, while multiple female neotenic would differentiate simultaneously from one dish,  
145 which limited the scope of our king based experiments.

146

## 147 **General bioassay procedure**

148 Unless noted otherwise, termites were divided into dishes of 30 workers and two  
149 soldiers, allowed to acclimate for at least 7 days and observed once. To lessen the statistical  
150 effects of repeated measures and to more efficiently use the available termites, we assayed 10  
151 replicate dishes per treatment and then returned the termites into a larger colony. Then we re-  
152 distributed the termites from the larger colony back into new replicate dishes. This allowed  
153 us to use the termite workers several times by randomizing individuals across replicates and  
154 treatments.

155 We assessed the differential responses of worker and soldier termites to neotenic  
156 queens and kings, workers, and soldiers. Behaviors that were readily observed and quantified  
157 included total time spent moving by the focal termite and the total number of allogrooming  
158 sessions, shaking responses, and antennations by both the focal termite (active) and by  
159 resident workers and soldiers that interacted with it (reactive). Of these, reactive shaking by  
160 resident termites in response to the introduced focal termite emerged as the most  
161 discriminating and showed a clear and significant difference between reproductive and non-  
162 reproductive individuals (below). Shaking behavior was defined as repetitive lateral  
163 oscillatory movements. All active shaking behaviors performed by the focal termite were



164 recorded, while reactive shaking behaviors in resident termites were only recorded when they  
165 were within approximately 1 mm of the focal individual. Whereas shaking responses by the  
166 resident termites (reactive shaking) significantly discriminated royal and non-royal castes,  
167 shaking responses by the focal termite (active shaking) varied across castes, but failed to  
168 discriminate workers and soldiers from queens (Fig 1A,B). Therefore, only shaking  
169 responses by resident termites in response to the introduced focal termite were used in  
170 subsequent assays. Antennation responses of resident termites were also informative, though  
171 to a lesser extent than shaking responses. Nevertheless, in all subsequent results we report on  
172 both reactive shaking and reactive antennation responses. We defined antennation as placing  
173 both antennae on another individual and any continuous contact was counted as one session.  
174 Termites had to move more than ~3 mm away from the focal termite before we recorded a  
175 second antennation session.

176

## 177 **Royal recognition bioassay**

178 All termites in these assays were from a single colony collected in Schenck Forest in  
179 2010. Queens and kings used in recognition assays were neotenic, as primary reproductives  
180 were too rare to provide effective replication. One hundred workers were placed into a 5-cm  
181 petri dish with moist unwoven paper towels or filter paper. Two soldiers were added to each  
182 dish to discourage soldier differentiation during the experiment. To differentiate the  
183 introduced (focal) worker from resident workers, the introduced worker was dyed blue by  
184 feeding on substrate impregnated with 0.1% Nile Blue. Workers turned blue in one to two  
185 weeks of consuming dyed diet and appeared to show no decrease in activity or survivorship,

186 as previously described [38]. A single dyed worker was introduced to each assay dish at least  
187 24 h before the assay. Assays consisted of removing the lid of the petri dish, wiping off any  
188 condensation to improve visibility, waiting at least 2 min to rest the termites, and observing  
189 the dyed focal worker for 10 min. Measured parameters included total time spent moving by  
190 the focal worker, total number of distinct allogrooming sessions, shaking response, as  
191 measured by the number of shaking events during the assay, and antennation response, as  
192 measured by the number of antennation events during the assay. All behaviors  
193 (allogrooming, shaking, and antennation) were measured in both the focal workers of the  
194 assay and the resident workers that interacted with it, leading to observed behaviors being  
195 divided into either active (actions performed by the focal termite) or reactive (reactions  
196 elicited by the focal termite from others) categories.

197

## 198 **Behavioral assays in light and dark conditions**

199 An experiment was conducted to examine the behavioral responses of workers to  
200 queens in the photophase and scotophase, and under light and dark conditions. Termites from  
201 a colony collected at Lake Johnson Park in 2015 were placed in a 5-cm petri dish (30 workers  
202 and 2 soldiers), observed once, and returned to the colony for re-use. A queen was introduced  
203 into each petri dish and observed either in a fully lit laboratory (~450 lux at the assay dishes)  
204 or within a dark box with only a red headlamp. Antennation and shaking elicited in resident  
205 termites were measured for 7 min.

206

## 207 **Foreign queen recognition bioassay**

208 We performed assays similar to our royal recognition assays to test the responses of  
209 nestmate termites to unrelated individuals in dishes with 30 nestmate workers and two  
210 nestmate soldiers. Termites were collected in 2015 from colonies found at Lake Johnson Park  
211 and Schenck Forest, respectively, which are approximately 6.5 km apart. These assays were  
212 designed to assess the queen recognition activity of foreign queens versus native queens and  
213 to support observations that *R. flavipes* colonies show no observable aggression toward  
214 foreign queens. Petri dish lids were removed and condensation was wiped from the lid before  
215 one of four treatments was added: nestmate neotenic queen, nestmate worker, foreign  
216 neotenic queen, or foreign worker. Observations began immediately after a focal termite was  
217 introduced. Replicates were observed for 7 min and cumulative antennation and shaking  
218 elicited in resident termites were recorded each min. Introduced workers were dyed blue for  
219 tracking purposes. All treatments had 10 replicate petri dishes. Dishes were assayed once and  
220 then re-distributed into a larger colony. Because only five queens were available at the time  
221 of this assay, each queen was observed in two replicate assays 1 week apart.

222

## 223 **Transfer of cuticular compounds to live termites**

224 To test whether the recognition behaviors elicited by queens were mediated by  
225 cuticular compounds and whether these compounds could be transferred to non-reproductive  
226 termites, we “perfumed” workers by tumbling queens with workers in various ratios. All  
227 termites used were collected in 2015 from a single colony from Lake Johnson Park in  
228 Raleigh. We included queen:worker ratios of 7:15, 1:1, 5:1, and 10:1 with a 40:15  
229 worker:dyed worker negative control and a live tumbled queen as positive control. Each

230 treatment (queen:worker ratio) and control was replicated 10 times. For the 7:15  
231 queen:worker and 40:15 worker:worker experiments, 15 blue-dyed workers were tumbled in  
232 glass vials with either 7 queens or 40 workers, respectively. After perfuming, five blue-dyed  
233 workers were frozen for extraction and cuticular analysis and 10 were removed to a clean  
234 petri dish for use in the bioassay. For all other ratios (1:1, 5:1, and 10:1), a blue-dyed worker  
235 was tumbled alone with 1, 5, or 10 queens and then observed in the bioassay. Neotenic  
236 queens were derived from the native colony in all treatments except for the 10:1  
237 queen:worker treatment, where three of the 10 queens were from a foreign colony. Cuticular  
238 compounds were transferred by placing live termites into 4 mL glass vials and gently rotating  
239 the vials to tumble them for 3 min. Efforts were made to maximize contact among termites.  
240 Queens were rested in the dark while running the assay and 5 tumbling sessions were  
241 performed each day to minimize stress in the queens. After tumbling, a single queen-  
242 “perfumed” dyed worker was added to each petri dish with 30 workers and two soldiers and  
243 immediately assayed for 7 min, recording cumulative antennation and shaking responses  
244 elicited in resident termites. As above, termites were assayed once and then re-distributed  
245 into a larger colony.

246

## 247 **Transfer of cuticular compounds to glass dummies**

248 We designed an experiment similar to the previous queen compound transfer bioassay  
249 to test whether queen cuticular compounds could be extracted in hexane and effectively  
250 transferred to glass dummies. We melted Pasteur pipette tips into roughly the length and  
251 diameter of a neotenic queen (~2 mm x ~6 mm). Neotenic queens, neotenic kings, and

252 workers were extracted in hexane (200  $\mu$ L/individual) for 2 min with gentle mixing. Hexane  
253 was transferred to new vials and evaporated under a gentle stream of high purity nitrogen.  
254 Final concentrations of 0.1, 0.3, 1, and 3 queen- or king-equivalents (QE or KE) per 20  $\mu$ L  
255 were created from the initial extract for a dose-response study of royal compounds. Worker  
256 controls were tested using 6 worker equivalents (WE) because worker body mass and CHC  
257 mass (CF, unpublished results) were approximately half those of queens and this would be  
258 equivalent to our highest concentration in royals. The bioassays tested one dummy per petri  
259 dish with two colonies (n = 10 dishes) for each queen treatment and controls and n = 5 dishes  
260 per colony for all king treatments due to limited availability of kings. First, glass dummies  
261 were rinsed in hexane and allowed to dry before applying 20  $\mu$ L of extract onto each in a  
262 glass petri dish. Hexane was allowed to evaporate from treated dummies for 5 min before  
263 introduction into assay dishes. Observations began 2 min after introducing the dummy to  
264 allow the termites to settle. We measured antennation, shaking responses, and  
265 presence/absence of aggression towards the dummies for 5 min. Aggression was defined as a  
266 repetitive lunging motion toward the dummy. In these assays, each group of termites in a  
267 dish was observed once per treatment, but then observed again in five other treatments, with  
268 a rest period of at least 24 h between assays. This experiment was performed with termites  
269 collected in 2013 from two colonies (one from Schenck Forest and one from Yates Mill  
270 Park) and the data from both colonies were combined when no differences were found  
271 between the colonies.

272

## 273 **Statistical Methods**

274 Comparisons made across treatments were analyzed with ANOVA with a post-hoc  
275 Tukey's honest significant difference test. All assay count data was square root transformed.  
276 Aggression data were analyzed using a chi-square test, as the behavior was recorded as either  
277 present or absent. All statistical tests were run in JMP (JMP®, Version 12. SAS Institute Inc.,  
278 Cary, NC, 1989-2007). Raw data for all experiments is available in the supporting  
279 information (S1 Dataset).

280

## 281 **Results**

282

### 283 **Royal recognition bioassays and behaviors elicited by different** 284 **castes**

285 We assessed the differential responses of worker and soldier termites to neotenic  
286 queens and kings, workers, and soldiers (Fig 1). Shaking behavior occurred ~5–8-fold more  
287 in response to a neotenic queen or king than to a worker or soldier (Fig 1B). Differences in  
288 antennation were less pronounced, showing a ~2–3-fold increase in response to reproductives  
289 (Fig 1D). Though not pursued in other assays, allogrooming and movement rates both  
290 showed patterns across caste. Grooming by the focal termite (active grooming) was almost  
291 exclusively performed by workers and the introduced focal workers groomed resident  
292 termites significantly more than other castes (Fig 1E). Queens elicited significantly more

293 allogrooming (reactive allogrooming) than workers, soldiers, or kings (Fig 1F). Workers  
294 moved around the assay dish significantly more than soldiers and kings, and both workers  
295 and queens spent ~2X more time moving in the assay dish than other castes (Fig 1G). While  
296 significant differences were found between castes for multiple behaviors, reactive shaking  
297 and antennation were the primary indicators of royal status.

298

299

300 **Fig 1. Termite behavioral responses to a worker, soldier, neotenic king, and neotenic**  
301 **queen.** Behavioral responses were measured in 10 min assays. Queens and kings in all assays  
302 were neotenic (secondary) reproductives generated within the lab. Each assay dish consisted  
303 of 30 workers, 2 soldiers, and an introduced live focal termite, and assays were conducted  
304 under ambient light conditions during the photophase. For all treatments the number of  
305 replicate assays is indicated under the axis for each caste in (G). Letters indicate significantly  
306 different values using one-way ANOVA ( $p < 0.05$ ) and Tukey's HSD. In the box plots, the  
307 horizontal line within the box represents the median value, the box represents the 25th to  
308 75th quantiles, and the wider green line represents the mean.

309

310

### 311 **Behavioral assays in light and dark conditions**

312 To optimize the behavioral assay we conducted observations in the photophase and  
313 scotophase and under light and dark conditions. There were no significant differences in the  
314 shaking (Fig 2A) or antennation responses (Fig 2B) to live neotenic queens between the

315 photophase and scotophase. Observations under dark conditions in both photophase and  
316 scotophase, however, yielded significantly lower rates of shaking toward live neotenic  
317 queens than in a lit room. While there were no differences in antennation during the  
318 photophase, observations during the scotophase also showed significantly lower rates of  
319 antennation under dark conditions. Therefore, all subsequent assays were conducted under  
320 ambient light conditions during the photophase.

321

322

323 **Fig 2. Response of termites to a live neotenic queen in light and dark conditions.** Each  
324 assay dish consisted of 30 workers, 2 soldiers, and a live queen observed for 7 minutes.  
325 Termites were assayed in their photophase and scotophase and under light and dark  
326 conditions measuring both shaking (**A**) and antennation responses (**B**). The number of  
327 replicate assays was 3. Letters indicate significantly different values using one-way ANOVA  
328 ( $p < 0.05$ ) and Tukey's HSD. In the box plots, the horizontal line within the box represents  
329 the median value, the box represents the 25th to 75th quantiles, and the wider green line  
330 represents the mean.

331

332

333

334 **Foreign queen bioassay: workers respond similarly to native and**  
335 **foreign queens**



336 In assays comparing responses to native and foreign workers and neotenic queens,  
337 workers and soldiers showed no overt aggression toward queens or workers introduced to  
338 dishes during the assay (CF, personal observations). However, both nestmate and foreign  
339 neotenic queens elicited strong shaking responses that were about four times higher than  
340 those elicited by nestmate and foreign workers (Fig 3A). Likewise, more antennation  
341 responses were elicited by nestmate neotenic queens than by nestmate workers, and foreign  
342 queens elicited more antennation responses than foreign workers (Fig 3B). Therefore, in  
343 some subsequent assays, foreign neotenic queens, which elicited strong responses similar to  
344 nestmate queens, were used, as noted, when nestmate queens were not available.

345

346

347 **Fig 3. Termite behavioral responses to native and foreign neotenic queen with foreign**  
348 **and native worker controls.** Shaking (A) and antennation (B) were measured in 7 min  
349 assays. Each assay dish consisted of 30 workers, 2 soldiers, and an introduced live focal  
350 termite, and assays were conducted under ambient light conditions during the photophase.  
351 The number of replicate assays is indicated under the axis for each caste. Letters indicate  
352 significantly different values using one-way ANOVA ( $p < 0.05$ ) and Tukey's HSD. In the  
353 box plots, the horizontal line within the box represents the median value, the box represents  
354 the 25th to 75th quantiles, and the wider green line represents the mean.

355

356

357 **Transfer of cuticular compounds to live termites and glass**  
358 **dummies: queen and king extracts elicit royal recognition**

359 To test whether queen recognition compounds could be transferred from the queen to  
360 workers, we tumbled workers with neotenic queens in glass vials to transfer queen-specific  
361 CHCs to workers, or “perfume” them with queen scent. As negative controls, we tumbled  
362 40:15 undyed workers with blue-dyed “focal” workers (i.e., 2.7X) to account for the greater  
363 body mass of queens. Dose-response assays included 0.5X to 10X queen:worker ratios, and a  
364 tumbled live queen represented the positive control. Queen-coated workers elicited  
365 significantly more shaking responses (Fig 4A) and antennation (Fig 4B) than worker-  
366 perfumed control workers. Notably, there was a clear dose-response relationship between the  
367 queen:worker ratio per tumbled worker and shaking responses (Fig 4A). However, despite  
368 the effective transfer of queen compounds to workers, none of the queen-perfumed workers  
369 elicited a shaking response as strong as live neotenic queens. Kings were not tested in these  
370 assays due to the small number of them available.

371

372

373 **Fig 4. Termite responses to live workers coated with neotenic queen cuticular**

374 **compounds.** Queen recognition behavior was measured in 7 min assays via shaking (**A**) and  
375 antennation (**B**) responses. Workers were tumbled in clean glass vials with other workers at a  
376 ratio of 40:15 (2.7X) dyed workers : undyed workers or with queens at ratios of Queen :  
377 Worker of 7:15 (0.5X), 1:1 (1X), 5:1 (5X), and 10:1 (10X). A live neotenic queen was

378 tumbled in a vial as a positive control. Each assay dish consisted of 30 workers, 2 soldiers,  
379 and a tumbled test individual, and assays were conducted under ambient light conditions  
380 during the photophase. For all treatments the number of replicate assays is indicated under its  
381 axis label. Letters indicate significantly different values using one-way ANOVA ( $p < 0.05$ )  
382 and Tukey's HSD. In the box plots, the horizontal line within the box represents the median  
383 value, the box represents the 25th to 75th quantiles, and the wider green line represents the  
384 mean.

385

386

387 Finally, to control for the presence of non-chemical cues on workers that might  
388 facilitate the queen recognition responses, we transferred hexane extracts of workers and  
389 neotenic queens and kings to glass dummies, which were introduced into assay dishes. We  
390 used the extract of 6 workers (6 WE) as negative control and 0.1 to 3 neotenic queen- or  
391 king-equivalents in a dose-response study. Shaking responses increased significantly with the  
392 dose of either queen- (Fig 5A) or king extracts (Fig 6A), with both 1 and 3 QE treatments  
393 and the 1 KE treatment being significantly higher than the respective worker extract controls.

394 Antennation responses to introduced glass dummies were uninformative in these assays.

395 Although termites responded to queen-extracts in a dose-dependent manner (Fig 5B), their  
396 antennation responses to 3 QE and worker extracts were not significantly different.

397 Antennation responses to king extracts on glass dummies were not significantly different  
398 across all treatments (Fig 6B).

399

400

401 **Fig 5. Termite responses to glass dummies treated with hexane extracts of neotenic**

402 **queens.** Lateral shaking (**A**) and antennation (**B**) were measured during 5 min assays for each  
403 treatment. Glass dummies were coated with hexane only (0), 0.1, 0.3, 1, and 3 queen  
404 equivalents along with worker extracts dissolved in hexane. Hexane extracts of workers were  
405 created by pooling 6 workers with mass approximately equal to 3 neotenic queens to  
406 approximate the highest queen concentration. Each assay dish consisted of 30 workers, 2  
407 soldiers, and an introduced glass dummy, and assays were conducted under ambient light  
408 conditions during the photophase. Letters indicate significantly different values using one-  
409 way ANOVA ( $p < 0.05$ ) and Tukey's HSD. For all treatments the number of replicate assays  
410 is indicated under its axis label. In the box plots, the horizontal line within the box represents  
411 the median value, the box represents the 25th to 75th quantiles, and the wider green line  
412 represents the mean.

413

414

415 **Fig 6. Termite response to glass dummies treated with hexane extracts of neotenic**

416 **kings.** Lateral shaking (**A**) and antennation (**B**) were measured during 5 min assays for each  
417 treatment. Glass dummies were coated with hexane only (0), 0.1, 0.3, 1, and 3 king  
418 equivalents along with worker extracts dissolved in hexane. Hexane extracts of workers were  
419 created by pooling 6 workers with mass approximately equal to 3 neotenic kings to  
420 approximate the highest king concentration. Each assay dish consisted of 30 workers, 2  
421 soldiers, and an introduced glass dummy, and assays were conducted under ambient light

422 conditions during the photophase. Letters indicate significantly different values using one-  
423 way ANOVA ( $p < 0.05$ ) and Tukey's HSD. For all treatments the number of replicate assays  
424 is indicated under its axis label. In the box plots, the horizontal line within the box represents  
425 the median value, the box represents the 25th to 75th quantiles, and the wider green line  
426 represents the mean.

427

428

429 The presence or absence of aggression (lunging behavior toward glass dummies) was  
430 also recorded in all assays (Fig 7). More aggression (65%) was directed at the control  
431 dummies coated with hexane than at workers (20%), kings (0–30% across concentrations),  
432 and queens (5–25% across concentrations). All extracts elicited significantly less worker  
433 aggression than the control dummies (Chi-square test, workers:  $df = 1$   $p < 0.017$ , kings:  $df =$   
434  $5$ ,  $p < 0.0001$ , queens:  $df = 5$ ,  $p < 0.0001$ ) (Fig 7).

435

436

437 **Fig 7. Relationship between aggressive behavior and cuticular extract concentrations of**  
438 **queens, kings, and workers.** Hexane was applied to glass dummies for the solvent control  
439 treatment. Concentrations are denoted in queen- and king-equivalents applied to glass  
440 dummies. Hexane extracts of workers were created by pooling 6 workers with mass  
441 approximately equal to 3 queens or kings. Glass dummies ( $n = 20$  for all queen  
442 concentrations and hexane controls except 3 QEs, which had 19,  $n = 10$  for all king  
443 concentrations and the worker extract) were observed for 5 min. Chi-square tests for each

444 caste show a significant effect on worker aggression for queens ( $df = 5, p < 0.0001$ ), kings  
445 ( $df = 5, p < 0.0001$ ), and workers ( $df = 1, p < 0.017$ ).

446

447

## 448 **Discussion**

449

### 450 **Lateral shaking as a royal recognition behavior**

451 Our aims were to demonstrate the existence of observable and repeatable recognition  
452 behavior by workers towards queens and kings in *R. flavipes* and to develop a reliable  
453 bioassay to facilitate future isolation and identification of royal recognition pheromones. Our  
454 bioassay results strongly support the conclusion that lateral or longitudinal shaking behavior  
455 is a strong indicator of neotenic queen and king recognition. Lateral shaking is different from  
456 head-drumming, which is used primarily by soldiers either to recruit termites or to send  
457 alarm signals through the nest substrate [35,37,39,40]. The lateral shaking behavior was  
458 differentially elicited by queens and kings more than by workers in all of our assays. This is  
459 the first empirical evidence of behavioral royal recognition in termites, and we used this  
460 assay to identify the first royal recognition pheromone in termites [13].

461 The function of the lateral shaking behavior remains unclear because it occurs in  
462 several contexts. First, this behavior is performed away from reproductives and by all castes,  
463 including neotenic queens and kings. Secondly, the prevalence of lateral shaking behavior is  
464 highly correlated with alarm or disturbance in the colony [41]. Our dark/light assays suggest

465 that this response is intensified under lit conditions and all recognition assays were  
466 performed in a lit lab and involved some disturbance as the focal termite or glass dummy was  
467 added to the assay dish. Shaking behavior might communicate a rapid local mechanical  
468 signal in disturbed or excited conditions to ensure the safety of high-value reproductives or  
469 begin repair of damaged areas of the nest. In the drywood termite *Cryptotermes secundus*,  
470 workers and nymphs exhibit increased aggression among nestmates after disturbance and an  
471 increase in shaking behavior in food-limited situations [31,42]. In both of these cases, the  
472 shaking behavior is interpreted as aggressive and it signals a transition from a cooperative to  
473 a more self-serving disposition in the study termites.

474 Shaking most likely does not elicit aggressive behavior in *R. flavipes* in the context of  
475 our bioassay. Indeed, aggression in this termite species is less frequent in general than in  
476 *Cryptotermes* termites, as contests for replacement reproductives are not commonly  
477 observed, the colony is much larger, and the nest habitat is larger and more prone to  
478 disturbance in colonies with satellite nests and vulnerable areas outside a single piece of  
479 wood. Overall, higher rates of shaking directed toward royals in all our assays, and also  
480 toward primary and neotenic queens and kings in undisturbed dishes (CF, personal  
481 observation), strongly support the notion that while shaking may serve multiple functions in  
482 *R. flavipes*, it is a major and predictable queen and king recognition response. Most  
483 significant was the observation that shaking responses increased with the dose of royal  
484 extract, whereas aggression responses declined. These results suggest that shaking in the  
485 context of this bioassay is a response to royal semiochemicals and not an aggressive  
486 response. In other contexts (e.g., foreign workers or soldiers, interspecific interactions)

487 shaking behavior might elicit aggression, but in these situations the shaking response should  
488 increase with the dose of the intruder semiochemicals. Because shaking behavior may  
489 convey different information in different contexts, it is also plausible that it was co-opted  
490 from ancestral alarm or agitation responses that elicited aggressive behaviors to be a royal-  
491 recognition response that modulates colony-wide behavior.

492         Although shaking behavior likely conveys information over relatively short range, as  
493 it is typically elicited from physical contact with a reproductive, workers are often observed  
494 shaking repeatedly after they move away from the queen or king. Therefore, this behavior  
495 could be amplified and dispersed over a longer distance through a chain of workers.

496         It is also possible that shaking responses in *R. flavipes* vary in response to different  
497 stimuli. Our real-time visual observations could not resolve nuances in this behavior, but it is  
498 possible that the frequency, amplitude and other features of the behavior may be context-  
499 specific. Physical measurements of termite jerking or drumming behavior have been recorded  
500 before with few conclusive statements about their purpose [33,35,36]. Whitman and  
501 Forschler [37] described four general types of shaking behavior distinguished by speed and  
502 frequency in *R. flavipes*. Our assays did not differentiate among these movements but  
503 included three of the four described.

504         Honey bees exhibit a behavior similar to termite shaking, called the vibration  
505 response, where individuals shake rapidly, leading their nestmates to change tasks within the  
506 colony [43,44]. Bees that receive these vibration stimuli are typically less active and show  
507 increased task performance after receiving the signal. Other royal recognition responses in  
508 social insects are typically chemically mediated and include retinue responses or other



509 aggregations around royal castes [15,28–30], queen tending behaviors such as grooming or  
510 feeding, and strong aggressive responses to establish reproductive dominance or prevent  
511 unwanted reproduction in the colony [45,46].

512

### 513 **Royal recognition is chemically mediated in *R. flavipes***

514 Lateral shaking is readily elicited in *R. flavipes* by cuticular chemicals of neotenic  
515 queens and kings (Figs 4–6). We transferred cuticular compounds from queens to worker  
516 termites by tumbling them in various queen : worker ratios. We also transferred hexane  
517 extracts of queen and king cuticular lipids to glass dummies. In both experiments, the royal-  
518 perfumed workers and glass dummies elicited significantly more shaking responses than the  
519 respective controls, indicating that royal-recognition pheromones were contained in the  
520 transferred chemicals. CHCs are most likely responsible, as they are the dominant feature of  
521 insect cuticular lipids, but fatty acids, esters, waxes, or other lipids may be involved. Indeed,  
522 in our recent research [13], we identified a suite of CHCs that are highly enriched in *R.*  
523 *flavipes* queens and kings as well as a royal-specific hydrocarbon, *n*-heneicosane. In addition,  
524 aggressive behaviors were significantly associated with hexane controls and low  
525 concentrations of termite extracts, but not with higher concentrations of queen, king or  
526 worker extracts (Fig 7), suggesting that these extracts likely contain colony recognition cues  
527 and can mitigate aggressive behaviors toward foreign objects. The behavioral assays we  
528 developed and validated for this study also facilitated further experiments that confirmed the  
529 activity of one of the candidate royal compounds, *n*-heneicosane, as a recognition pheromone  
530 in this species [13].

531 Other species of termites possess CHCs that have been linked to reproductive status,  
532 but their functions in royal recognition have not been demonstrated [12,25]. In contrast, CHC  
533 recognition pheromones have been demonstrated in many social hymenopterans, including  
534 various ant species and *Polistes* wasps [16,18,28,45,47–49]. Van Oystaeyen et al. [17] found  
535 that species from across the hymenopteran phylogeny (ant, bee, and wasp) use similar CHCs  
536 as queen pheromones, which act to reduce or suppress ovary development. They also  
537 compared fertility signals across 64 species of social Hymenoptera to conclude that saturated  
538 CHCs are a conserved class of pheromones that function similarly across a diverse  
539 assemblage of species (but see Amsalem et al. [50], countered by Holman et al. [51]). The  
540 wide phylogenetic distance between the eusocial Hymenoptera and termites, and their shared  
541 use of CHCs as fertility signals, could indicate an intriguing case of convergent evolution  
542 that would push the use of CHCs as royal pheromones from ~100 million years ago  
543 (evolution of bees, ants and wasps) to ~150 million years ago, when eusocial termites  
544 evolved from within the cockroaches.

545 In conclusion, we report a highly discriminating bioassay that quantitatively related  
546 shaking behavior in workers and soldiers to presence of a neotenic queen or king. We further  
547 showed that queen and king cuticular compounds elicited this behavior. Our bioassay should  
548 prove to be useful for future research to identify specific royal pheromones, the social status  
549 of newly emerging reproductives, and the activity of candidate volatile and non-volatile royal  
550 pheromones. Queens and kings possess similar cuticular profiles in *R. flavipes* and both sexes  
551 elicit increased lateral shaking and antennation. By examining caste-specific differences in  
552 cuticular profiles, and using this behavioral assay, we recently identified the chemical basis

553 for this behavior, the first queen recognition pheromone, and the first ever king pheromone in  
554 termites [13]. Other caste-specific CHCs remain to be evaluated with these new behavioral  
555 assays. Finally, the function of shaking behavior should also be the target of future research  
556 to understand how this behavior changes in different contexts within the colony and whether  
557 the shaking behavior consists of different elements that require closer scrutiny with high  
558 speed photography and laser Doppler vibrometry.

559

## 560 **Supporting Information**

561 **S1 Dataset. Raw assay data for all figures.**

562

## 563 **Acknowledgments**

564 We would like to acknowledge Paul Labadie for help collecting termites. We also would like  
565 to thank the administration of Historic Yates Mill County Park, Lake Johnson Park, and  
566 Schenck Forest for their support during our project.

567

## 568 **References**

- 569 1. Hölldobler B, Wilson EO. The Ants. Cambridge, MA: Belknap Press of Harvard Univ.  
570 Press; 1990.
- 571 2. Blum MS. Semiochemical parsimony in the Arthropoda. *Annu Rev Entomol.* 1996;41:  
572 353–374. doi:10.1146/annurev.en.41.010196.002033

- 573 3. West MJ. Foundress associations in polistine wasps: dominance hierarchies and the  
574 evolution of social behavior. *Science*. 1967;157: 1584–1585.  
575 doi:10.1126/science.157.3796.1584
- 576 4. Liebig J, Peeters C, Hölldobler B. Worker policing limits the number of reproductives  
577 in a ponerine ant. *Proc R Soc Lond B Biol Sci*. 1999;266: 1865–1870.  
578 doi:10.1098/rspb.1999.0858
- 579 5. Tibbetts EA, Dale J. A socially enforced signal of quality in a paper wasp. *Nature*.  
580 2004;432: 218–222. doi:10.1038/nature02949
- 581 6. Bignell DE, Roisin Y, Lo N. *Biology of Termites: a Modern Synthesis* [Internet]. 2nd  
582 ed. Netherlands (doi: 10.1007/978-90-481-3977-4): Springer; 2014. Available:  
583 <https://link.springer.com/book/10.1007%2F978-90-481-3977-4>
- 584 7. Yamamoto Y, Matsuura K. Genetic influence on caste determination underlying the  
585 asexual queen succession system in a termite. *Behav Ecol Sociobiol*. 2012;66: 39–46.  
586 doi:10.1007/s00265-011-1249-4
- 587 8. Light SF, Weesner FM. Further studies on the production of supplementary  
588 reproductives in *Zootermopsis* (Isoptera). *J Exp Zool*. 1951;117: 397–414.  
589 doi:10.1002/jez.1401170302
- 590 9. Lüscher M. Social control of polymorphism in termites. *Insect Polymorphism*. London,  
591 UK: Royal Entomological Society of London; 1961. pp. 57–67.
- 592 10. Matsuura K, Himuro C, Yokoi T, Yamamoto Y, Vargo EL, Keller L. Identification of a  
593 pheromone regulating caste differentiation in termites. *Proc Natl Acad Sci*. 2010;107:  
594 12963–12968. doi:10.1073/pnas.1004675107
- 595 11. Himuro C, Yokoi T, Matsuura K. Queen-specific volatile in a higher termite  
596 *Nasutitermes takasagoensis* (Isoptera: Termitidae). *J Insect Physiol*. 2011;57: 962–965.  
597 doi:10.1016/j.jinsphys.2011.04.012
- 598 12. Liebig J, Eliyahu D, Brent CS. Cuticular hydrocarbon profiles indicate reproductive  
599 status in the termite *Zootermopsis nevadensis*. *Behav Ecol Sociobiol*. 2009;63: 1799–  
600 1807. doi:10.1007/s00265-009-0807-5
- 601 13. Funaro CF, Böröczky K, Vargo EL, Schal C. Identification of a queen and king  
602 recognition pheromone in the subterranean termite *Reticulitermes flavipes*. *Proc Natl*  
603 *Acad Sci*. 2018;115: 3888–3893. doi:10.1073/pnas.1721419115
- 604 14. Rocca JR, Tumlinson JH, Glancey BM, Lofgren CS. The queen recognition pheromone  
605 of *Solenopsis invicta*, preparation of (E-6-(1-pentenyl)-2H-pyran-2-one. *Tetrahedron*  
606 *Lett*. 1983;24: 1889–1892. doi:10.1016/S0040-4039(00)81798-0

- 607 15. Slessor KN, Kaminski L-A, King GGS, Borden JH, Winston ML. Semiochemical basis  
608 of the retinue response to queen honey bees. *Nature*. 1988;332: 354–356.  
609 doi:10.1038/332354a0
- 610 16. Espelie KE, Gamboa GJ, Grudzien TA, Bura EA. Cuticular hydrocarbons of the paper  
611 wasp, *Polistes fuscatus*: A search for recognition pheromones. *J Chem Ecol*. 1994;20:  
612 1677–1687. doi:10.1007/BF02059889
- 613 17. Van Oystaeyen A, Oliveira RC, Holman L, van Zweden JS, Romero C, Oi CA, et al.  
614 Conserved class of queen pheromones stops social insect workers from reproducing.  
615 *Science*. 2014;343: 287–290. doi:10.1126/science.1244899
- 616 18. Holman L, Hanley B, Millar JG. Highly specific responses to queen pheromone in three  
617 *Lasius* ant species. *Behav Ecol Sociobiol*. 2016;70: 387–392. doi:10.1007/s00265-016-  
618 2058-6
- 619 19. Blomquist GJ, Bagnères AG. *Insect Hydrocarbons: Biology, Biochemistry, and*  
620 *Chemical Ecology*. Cambridge: Cambridge Univ Press; 2010.
- 621 20. Chung H, Carroll SB. Wax, sex and the origin of species: Dual roles of insect cuticular  
622 hydrocarbons in adaptation and mating. *BioEssays News Rev Mol Cell Dev Biol*.  
623 2015;37: 822–830. doi:10.1002/bies.201500014
- 624 21. Bagnères A-G, Rivière G, Clément J-L. Artificial neural network modeling of caste  
625 odor discrimination based on cuticular hydrocarbons in termites. *Chemoecology*.  
626 1998;8: 201–209. doi:10.1007/s000490050026
- 627 22. Batista-Pereira LG, Dos Santos MG, Corrêa AG, Fernandes JB, Arab A, Costa-  
628 Leonardo AM, et al. Cuticular hydrocarbons of *Heterotermes tenuis* (Isoptera:  
629 Rhinotermitidae): analyses and electrophysiological studies. *Z Für Naturforschung C*.  
630 2004;59: 135–139. doi:10.1515/znc-2004-1-226
- 631 23. Darrouzet E, Labédan M, Landré X, Perdereau E, Christidès JP, Bagnères AG.  
632 Endocrine control of cuticular hydrocarbon profiles during worker-to-soldier  
633 differentiation in the termite *Reticulitermes flavipes*. *J Insect Physiol*. 2014;61: 25–33.  
634 doi:10.1016/j.jinsphys.2013.12.006
- 635 24. Haverty MI, Grace JK, Nelson LJ, Yamamoto RT. Intercaste, intercolony, and temporal  
636 variation in cuticular hydrocarbons of *Coptotermes formosanus* Shiraki (Isoptera:  
637 Rhinotermitidae). *J Chem Ecol*. 1996;22: 1813–1834. doi:10.1007/BF02028506
- 638 25. Weil T, Hoffmann K, Kroiss J, Strohm E, Korb J. Scent of a queen—cuticular  
639 hydrocarbons specific for female reproductives in lower termites. *Naturwissenschaften*.  
640 2009;96: 315–319. doi:10.1007/s00114-008-0475-8

- 641 26. Bagnères AG, Clément JL, Blum MS, Severson RF, Joulie C, Lange C. Cuticular  
642 hydrocarbons and defensive compounds of *Reticulitermes flavipes* (Kollar) and *R.*  
643 *santonensis* (Feytaud): Polymorphism and chemotaxonomy. *J Chem Ecol.* 1990;16:  
644 3213–3244. doi:10.1007/BF00982094
- 645 27. Bagnères A-G, Killian A, Clément J-L, Lange C. Interspecific recognition among  
646 termites of the genus *Reticulitermes*: Evidence for a role for the cuticular hydrocarbons.  
647 *J Chem Ecol.* 1991;17: 2397–2420. doi:10.1007/BF00994590
- 648 28. Dietemann V, Peeters C, Liebig J, Thivet V, Hölldobler B. Cuticular hydrocarbons  
649 mediate discrimination of reproductives and nonreproductives in the ant *Myrmecia*  
650 *gulosus*. *Proc Natl Acad Sci U S A.* 2003;100: 10341–10346.  
651 doi:10.1073/pnas.1834281100
- 652 29. Nunes TM, Mateus S, Favaris AP, Amaral MFZJ, Zuben LG von, Clososki GC, et al.  
653 Queen signals in a stingless bee: suppression of worker ovary activation and spatial  
654 distribution of active compounds. *Sci Rep.* 2014;4: srep07449. doi:10.1038/srep07449
- 655 30. Vander Meer RK, Glancey BM, Lofgren CS, Glover A, Tumlinson JH, Rocca J. The  
656 poison sac of red imported fire ant queens: source of a pheromone attractant. *Ann*  
657 *Entomol Soc Am.* 1980;73: 609–612. doi:10.1093/aesa/73.5.609
- 658 31. Korb J. Regulation of sexual development in the basal termite *Cryptotermes secundus*:  
659 mutilation, pheromonal manipulation or honest signal? *Naturwissenschaften.* 2005;92:  
660 45–49. doi:10.1007/s00114-004-0589-6
- 661 32. Penick CA, Trobaugh B, Brent CS, Liebig J. Head-butting as an early indicator of  
662 reproductive disinhibition in the termite *Zootermopsis nevadensis*. *J Insect Behav.*  
663 2013;26: 23–34. doi:10.1007/s10905-012-9332-x
- 664 33. Howse PE. On the significance of certain oscillatory movements of termites. *Insectes*  
665 *Sociaux.* 1965;12: 335–345. doi:10.1007/BF02222723
- 666 34. Howse PE. The significance of the sound produced by the termite *Zootermopsis*  
667 *angusticollis* (Hagen). *Anim Behav.* 1964;12: 284–300. doi:10.1016/0003-  
668 3472(64)90015-6
- 669 35. Kirchner WH, Broecker I, Tautz J. Vibrational alarm communication in the damp-wood  
670 termite *Zootermopsis nevadensis*. *Physiol Entomol.* 1994;19: 187–190.  
671 doi:10.1111/j.1365-3032.1994.tb01041.x
- 672 36. Ohmura W, Takanashi T, Suzuki Y. Behavioral analysis of tremulation and tapping of  
673 termites (Isoptera). *Sociobiology.* 2009;54: 269–274.

- 674 37. Whitman JG, Forschler BT. Observational notes on short-lived and infrequent behaviors  
675 displayed by *Reticulitermes flavipes* (Isoptera: Rhinotermitidae). *Ann Entomol Soc Am.*  
676 2007;100: 763–771. doi:10.1603/0013-8746(2007)100[763:ONOSAI]2.0.CO;2
- 677 38. Su N, Ban P, Scheffrahn R. Evaluation of 12 dye markers for population studies of the  
678 eastern and formosan subterranean termite (Isoptera, Rhinotermitidae). *Sociobiology.*  
679 1991;19: 349–362.
- 680 39. Evans TA, Lai JC, Toledano E, McDowall L, Rakotonarivo S, Lenz M. Termites assess  
681 wood size by using vibration signals. *Proc Natl Acad Sci U S A.* 2005;102: 3732–3737.  
682 doi:10.1073/pnas.0408649102
- 683 40. Hager FA, Kirchner WH. Vibrational long-distance communication in the termites  
684 *Macrotermes natalensis* and *Odontotermes sp.* *J Exp Biol.* 2013;216: 3249–3256.  
685 doi:10.1242/jeb.086991
- 686 41. Reinhard J, Clément J-L. Alarm reaction of European *Reticulitermes* termites to soldier  
687 head capsule volatiles (Isoptera, Rhinotermitidae). *J Insect Behav.* 2002;15: 95–107.  
688 doi:10.1023/A:1014436313710
- 689 42. Korb J, Schmidinger S. Help or disperse? Cooperation in termites influenced by food  
690 conditions. *Behav Ecol Sociobiol.* 2004;56: 89–95. doi:10.1007/s00265-004-0757-x
- 691 43. Hyland KM, Cao TT, Malechuk AM, Lewis LA, Schneider SS. Vibration signal  
692 behaviour and the use of modulatory communication in established and newly founded  
693 honeybee colonies. *Anim Behav.* 2007;73: 541–551.  
694 doi:10.1016/j.anbehav.2006.10.006
- 695 44. Schneider SS, Lewis LA. The vibration signal, modulatory communication and the  
696 organization of labor in honey bees, *Apis mellifera*. *Apidologie.* 2004;35: 117–131.  
697 doi:10.1051/apido:2004006
- 698 45. Liebig J, Peeters C, Oldham NJ, Markstadter C, Holldobler B. Are variations in  
699 cuticular hydrocarbons of queens and workers a reliable signal of fertility in the ant  
700 *Harpegnathos saltator*? *Proc Natl Acad Sci U S A.* 2000;97: 4124–4131.  
701 doi:10.1073/pnas.97.8.4124
- 702 46. Smith AA, Millar JG, Hanks LM, Suarez AV. Experimental evidence that workers  
703 recognize reproductives through cuticular hydrocarbons in the ant *Odontomachus*  
704 *brunneus*. *Behav Ecol Sociobiol.* 2012;66: 1267–1276. doi:10.1007/s00265-012-1380-x
- 705 47. Holman L, Jorgensen CG, Nielsen J, d’Ettorre P. Identification of an ant queen  
706 pheromone regulating worker sterility. *Proc R Soc B Biol Sci.* 2010;277: 3793–3800.  
707 doi:10.1098/rspb.2010.0984

- 708 48. Smith AA, Millar JG, Suarez AV. A social insect fertility signal is dependent on  
709 chemical context. *Biol Lett.* 2015;11: 20140947. doi:10.1098/rsbl.2014.0947
- 710 49. Smith AA, Millar JG, Hanks LM, Suarez AV. A conserved fertility signal despite  
711 population variation in the cuticular chemical profile of the trap-jaw ant *Odontomachus*  
712 *brunneus*. *J Exp Biol.* 2013;216: 3917–3924. doi:10.1242/jeb.089482
- 713 50. Amsalem E, Orlova M, Grozinger CM. A conserved class of queen pheromones? Re-  
714 evaluating the evidence in bumblebees (*Bombus impatiens*). *Proc R Soc B.* 2015;282:  
715 20151800. doi:10.1098/rspb.2015.1800
- 716 51. Holman L, van Zweden JS, Oliveira RC, van Oystaeyen A, Wenseleers T. Conserved  
717 queen pheromones in bumblebees: a reply to Amsalem et al. *PeerJ.* 2017;5.  
718 doi:10.7717/peerj.3332
- 719



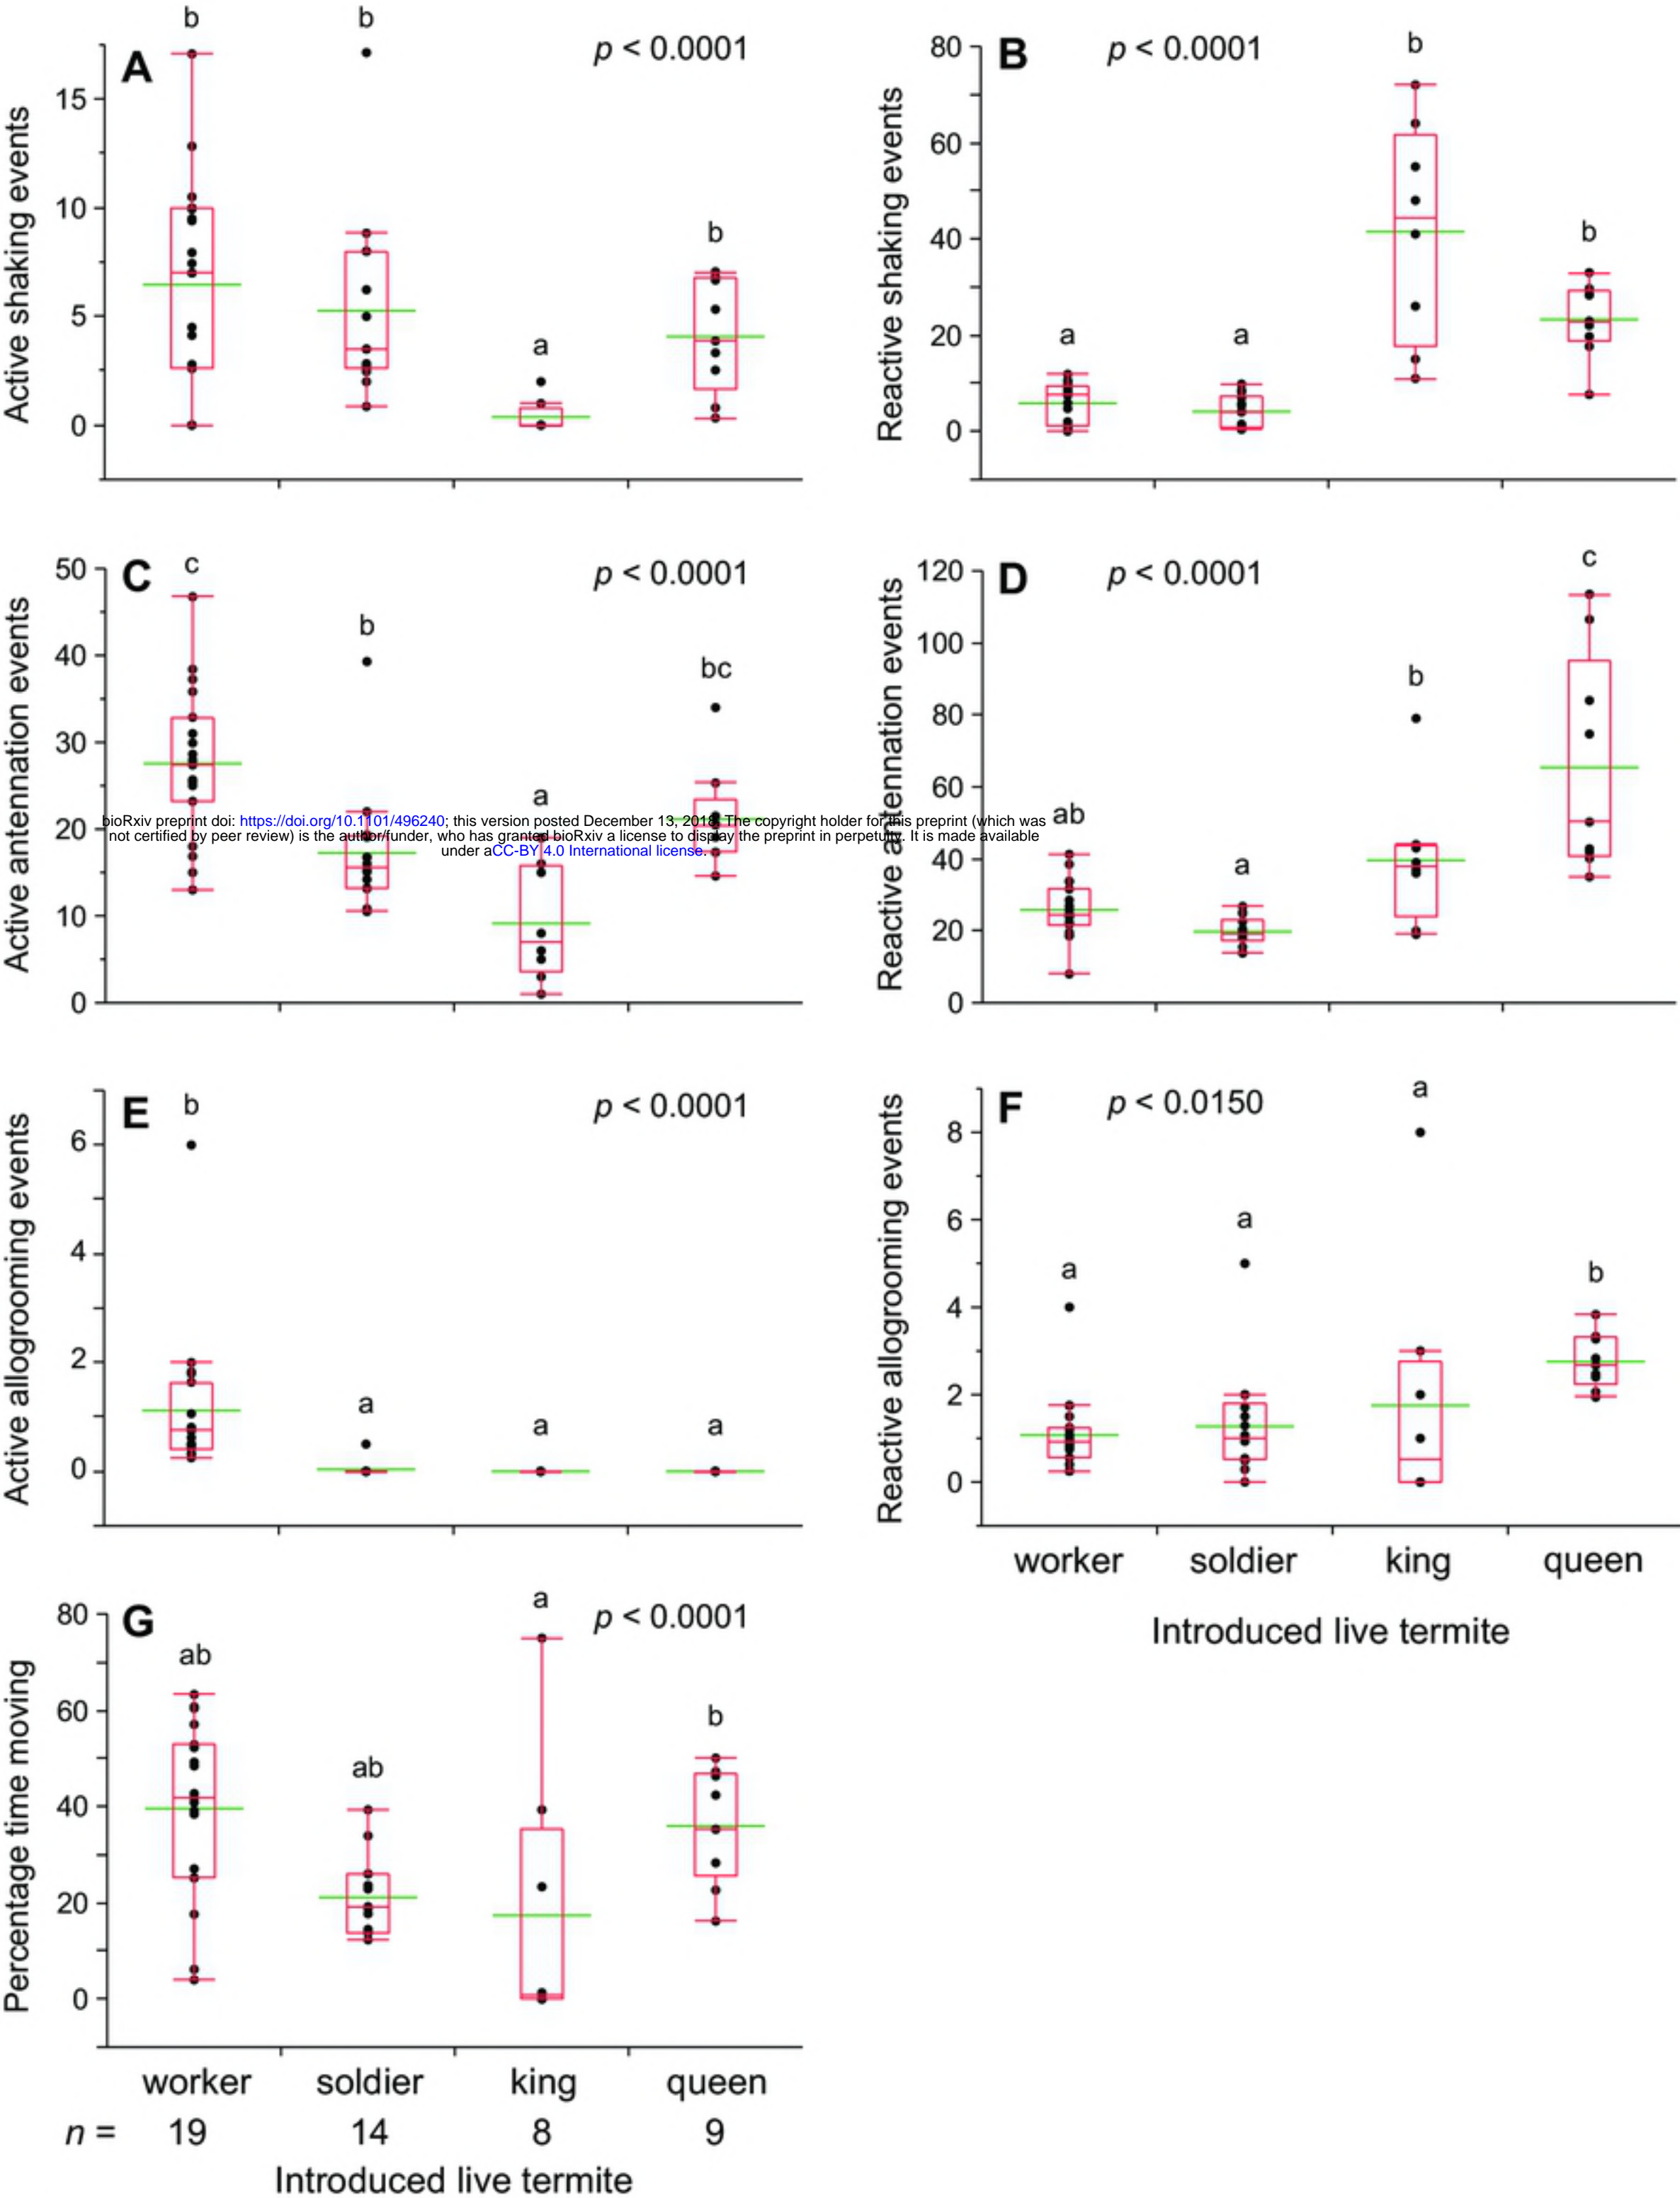

Figure 1

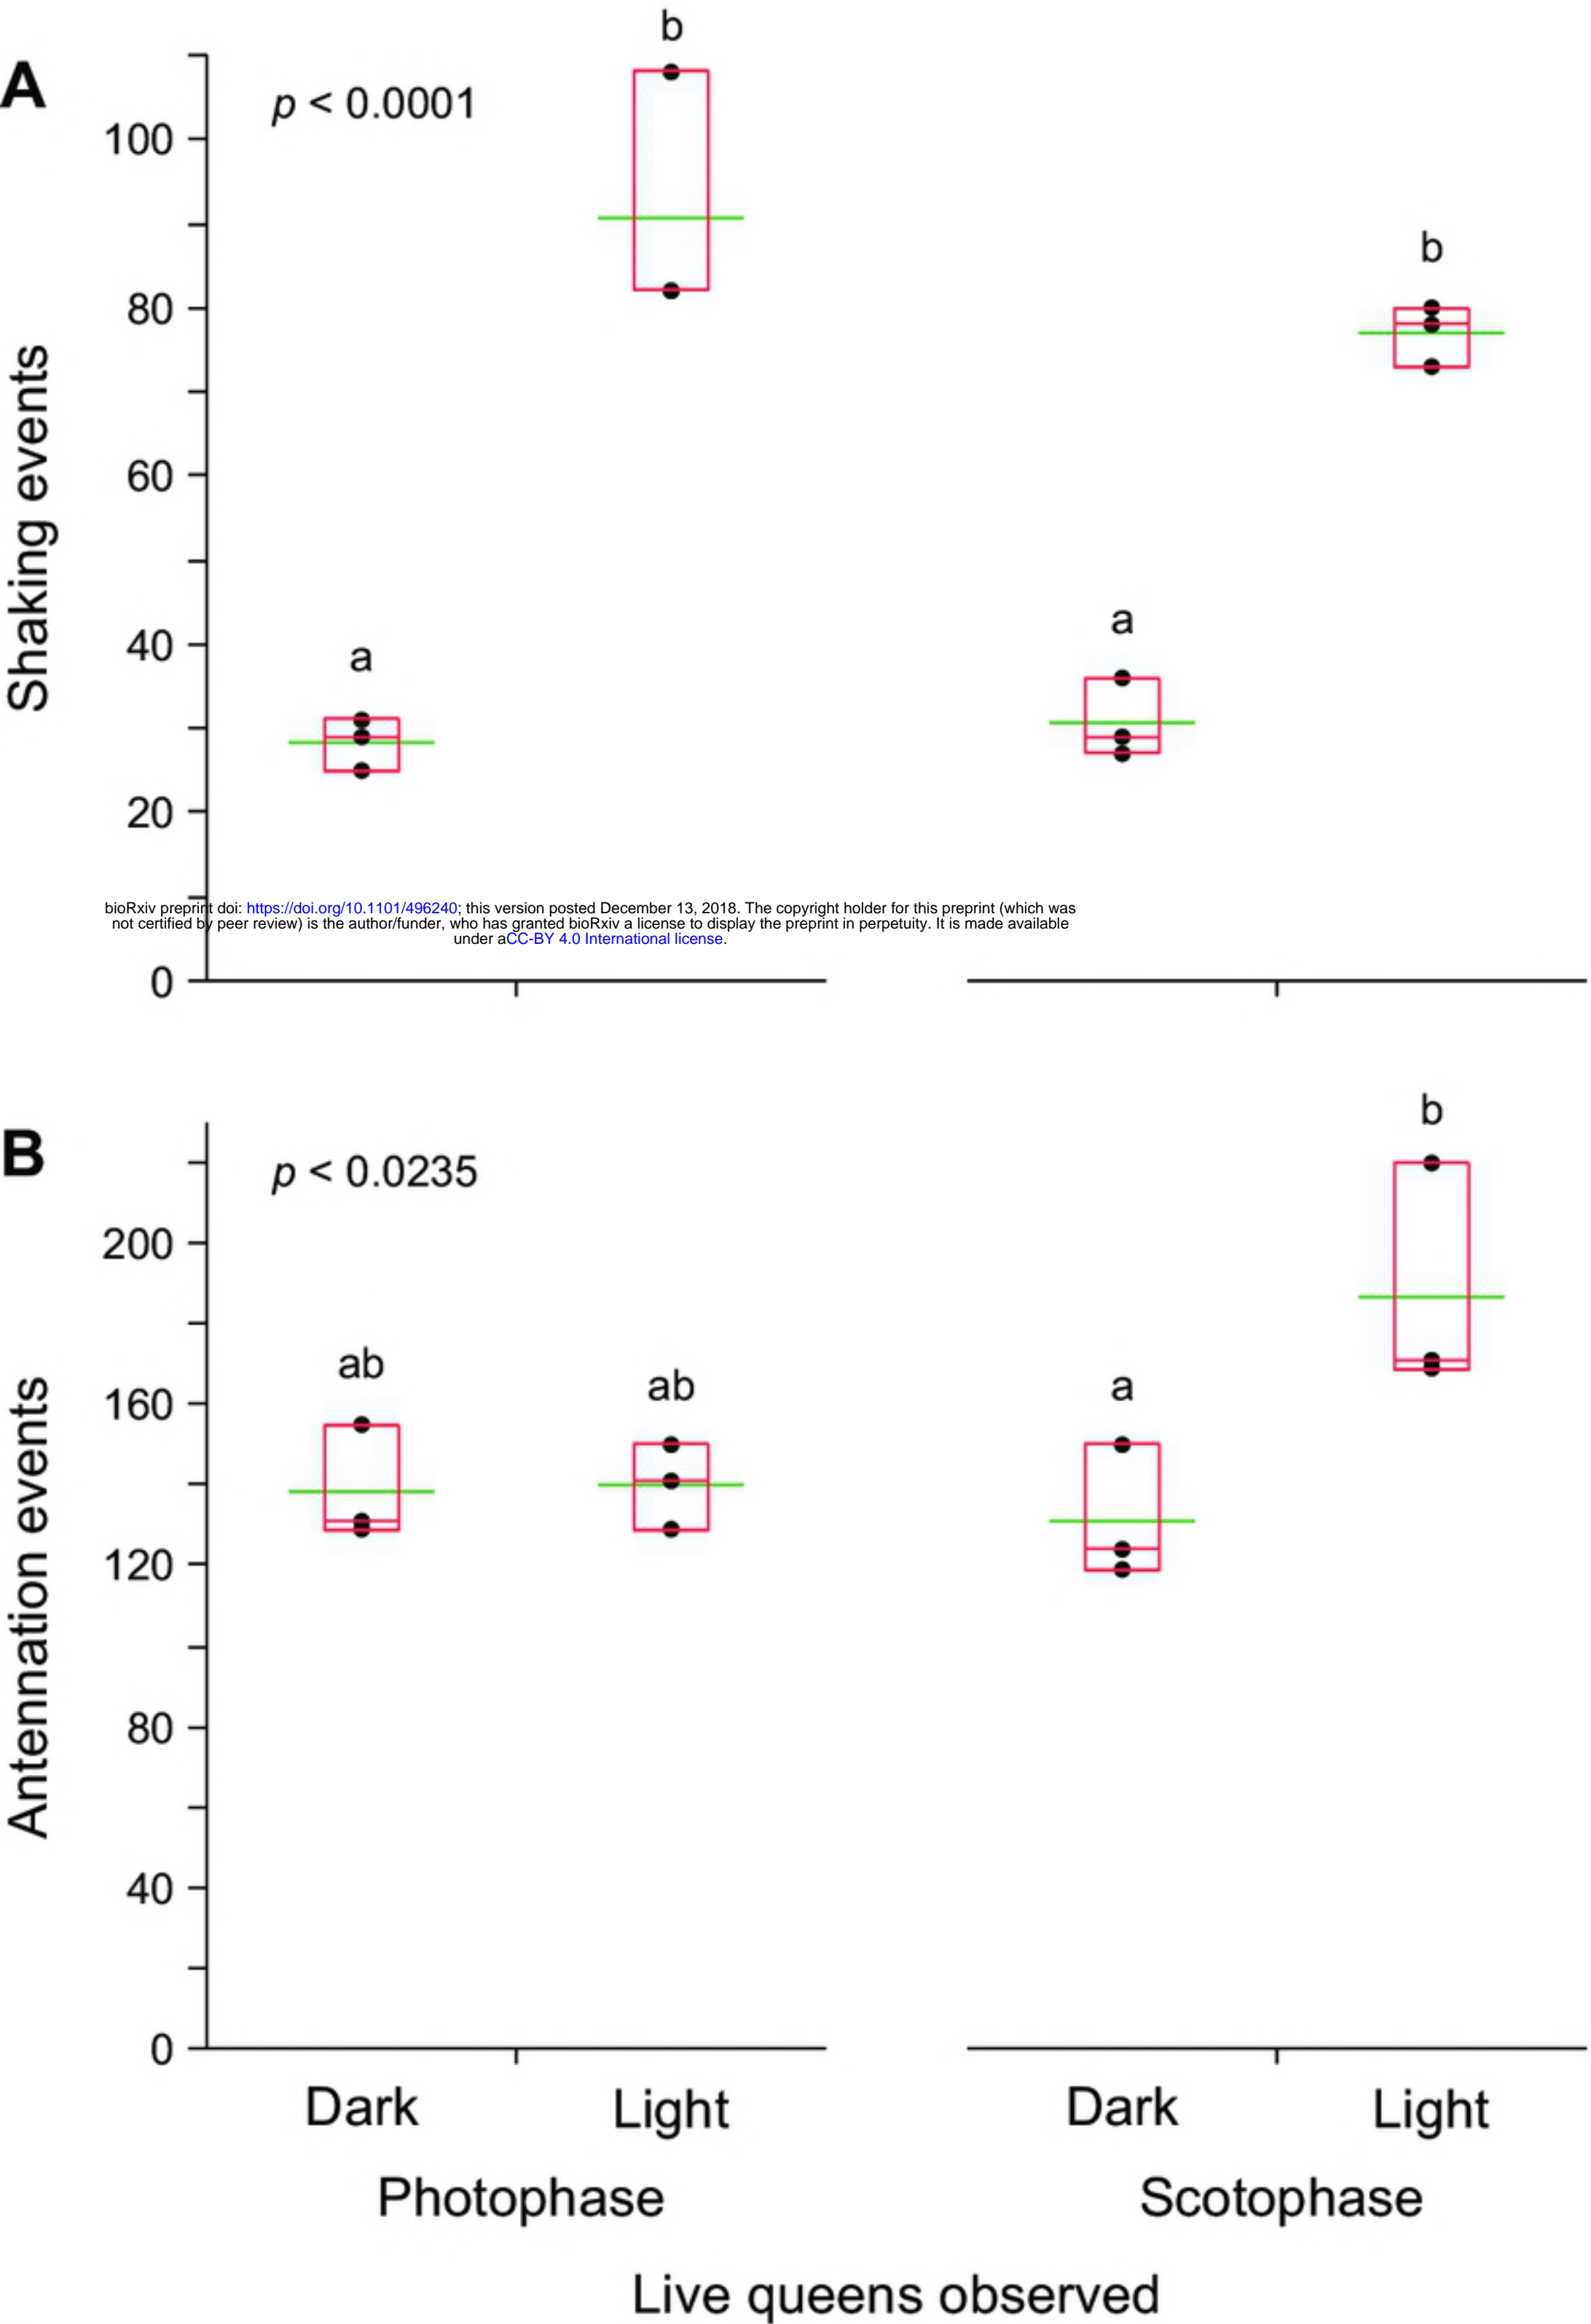

Figure 2

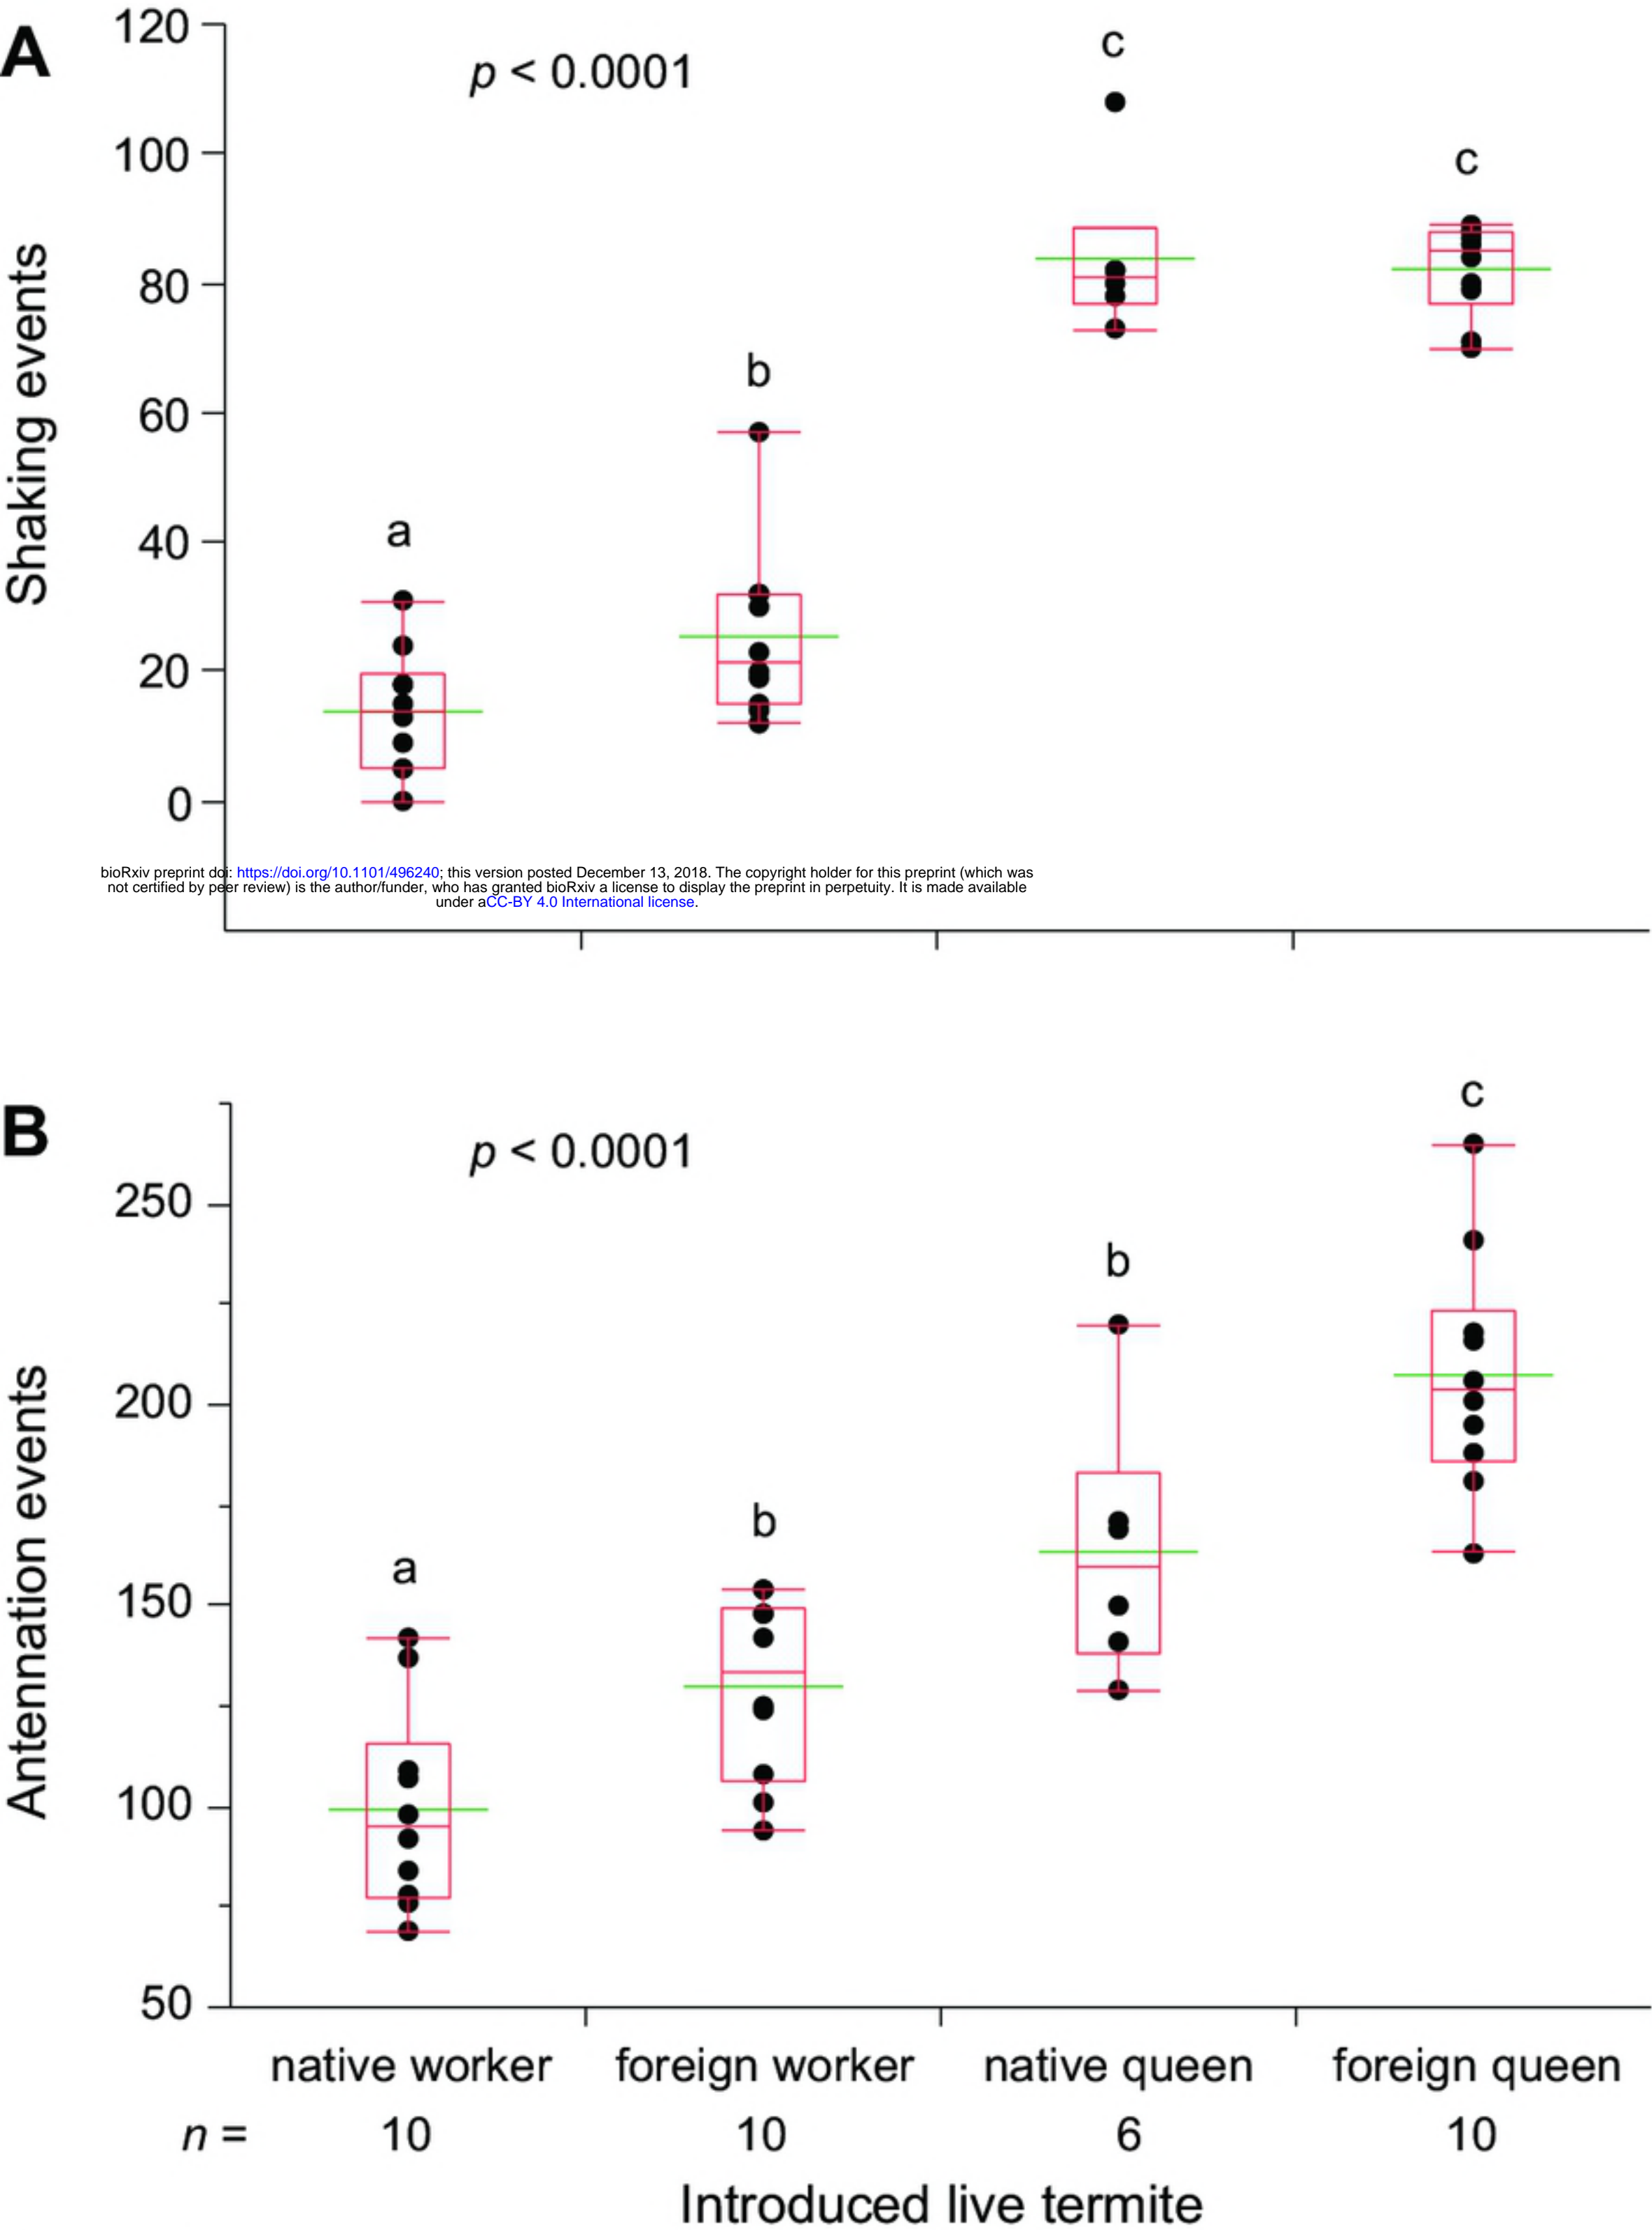

Figure 3

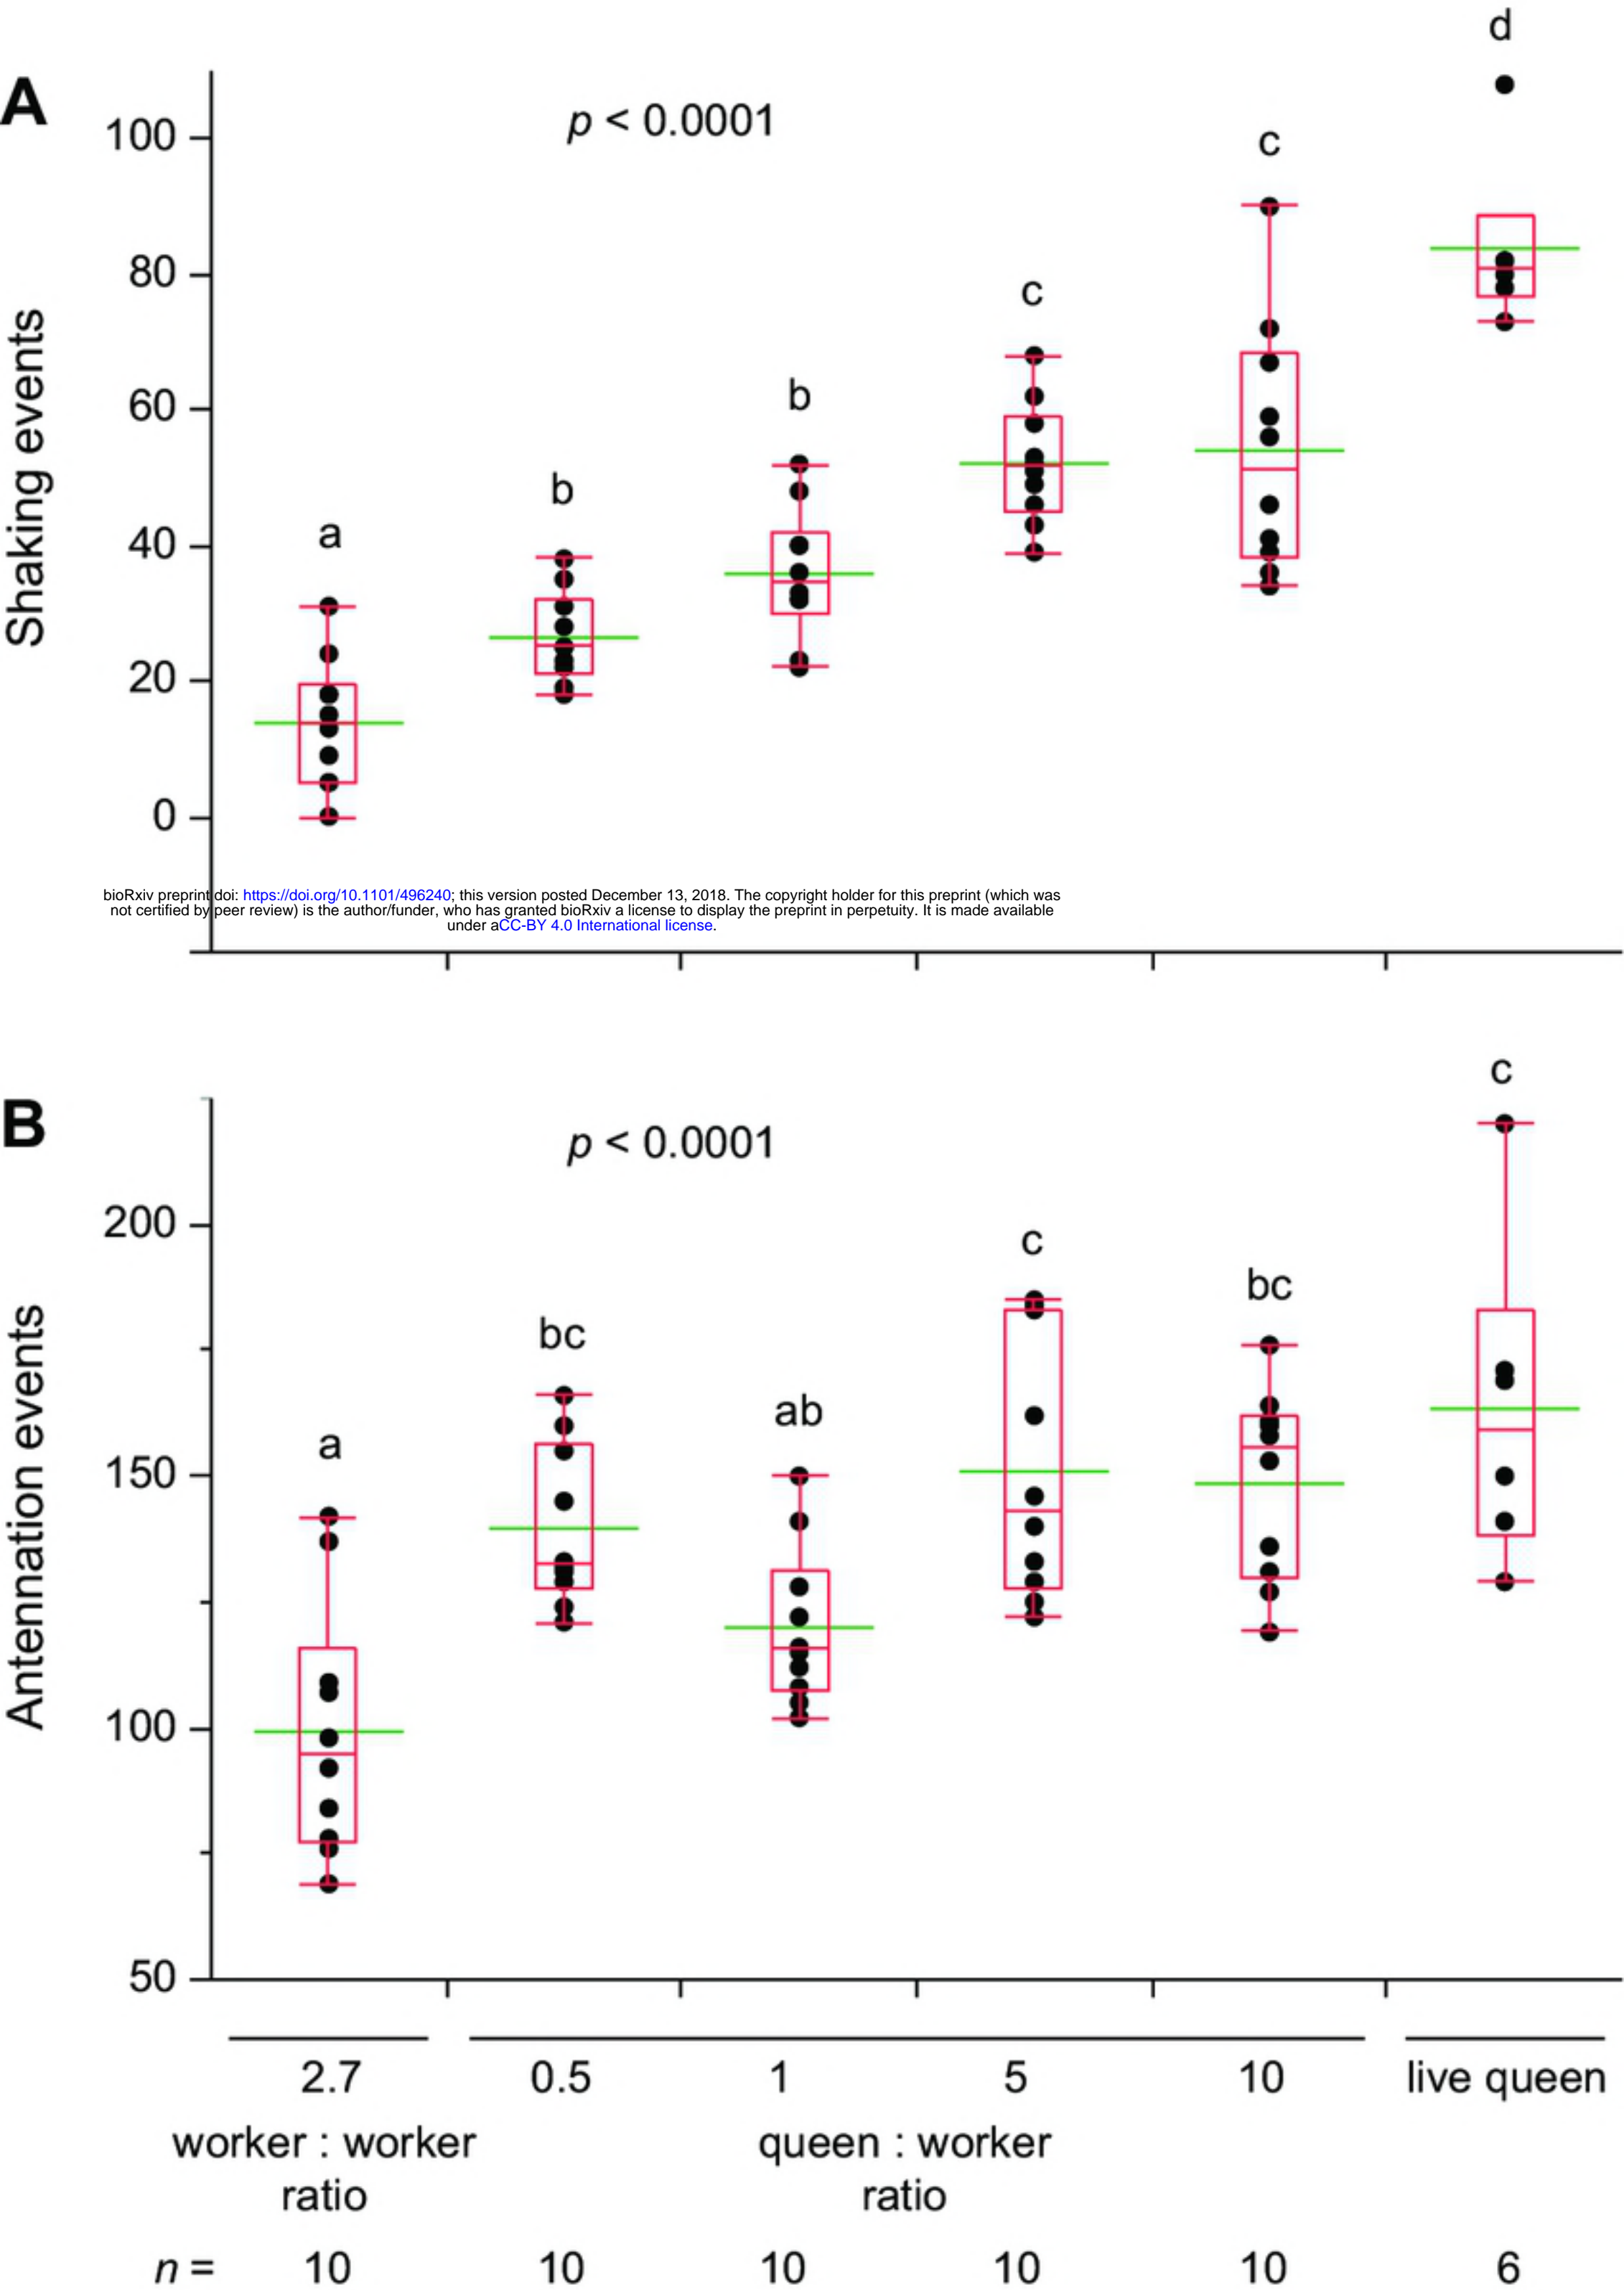

Figure 4

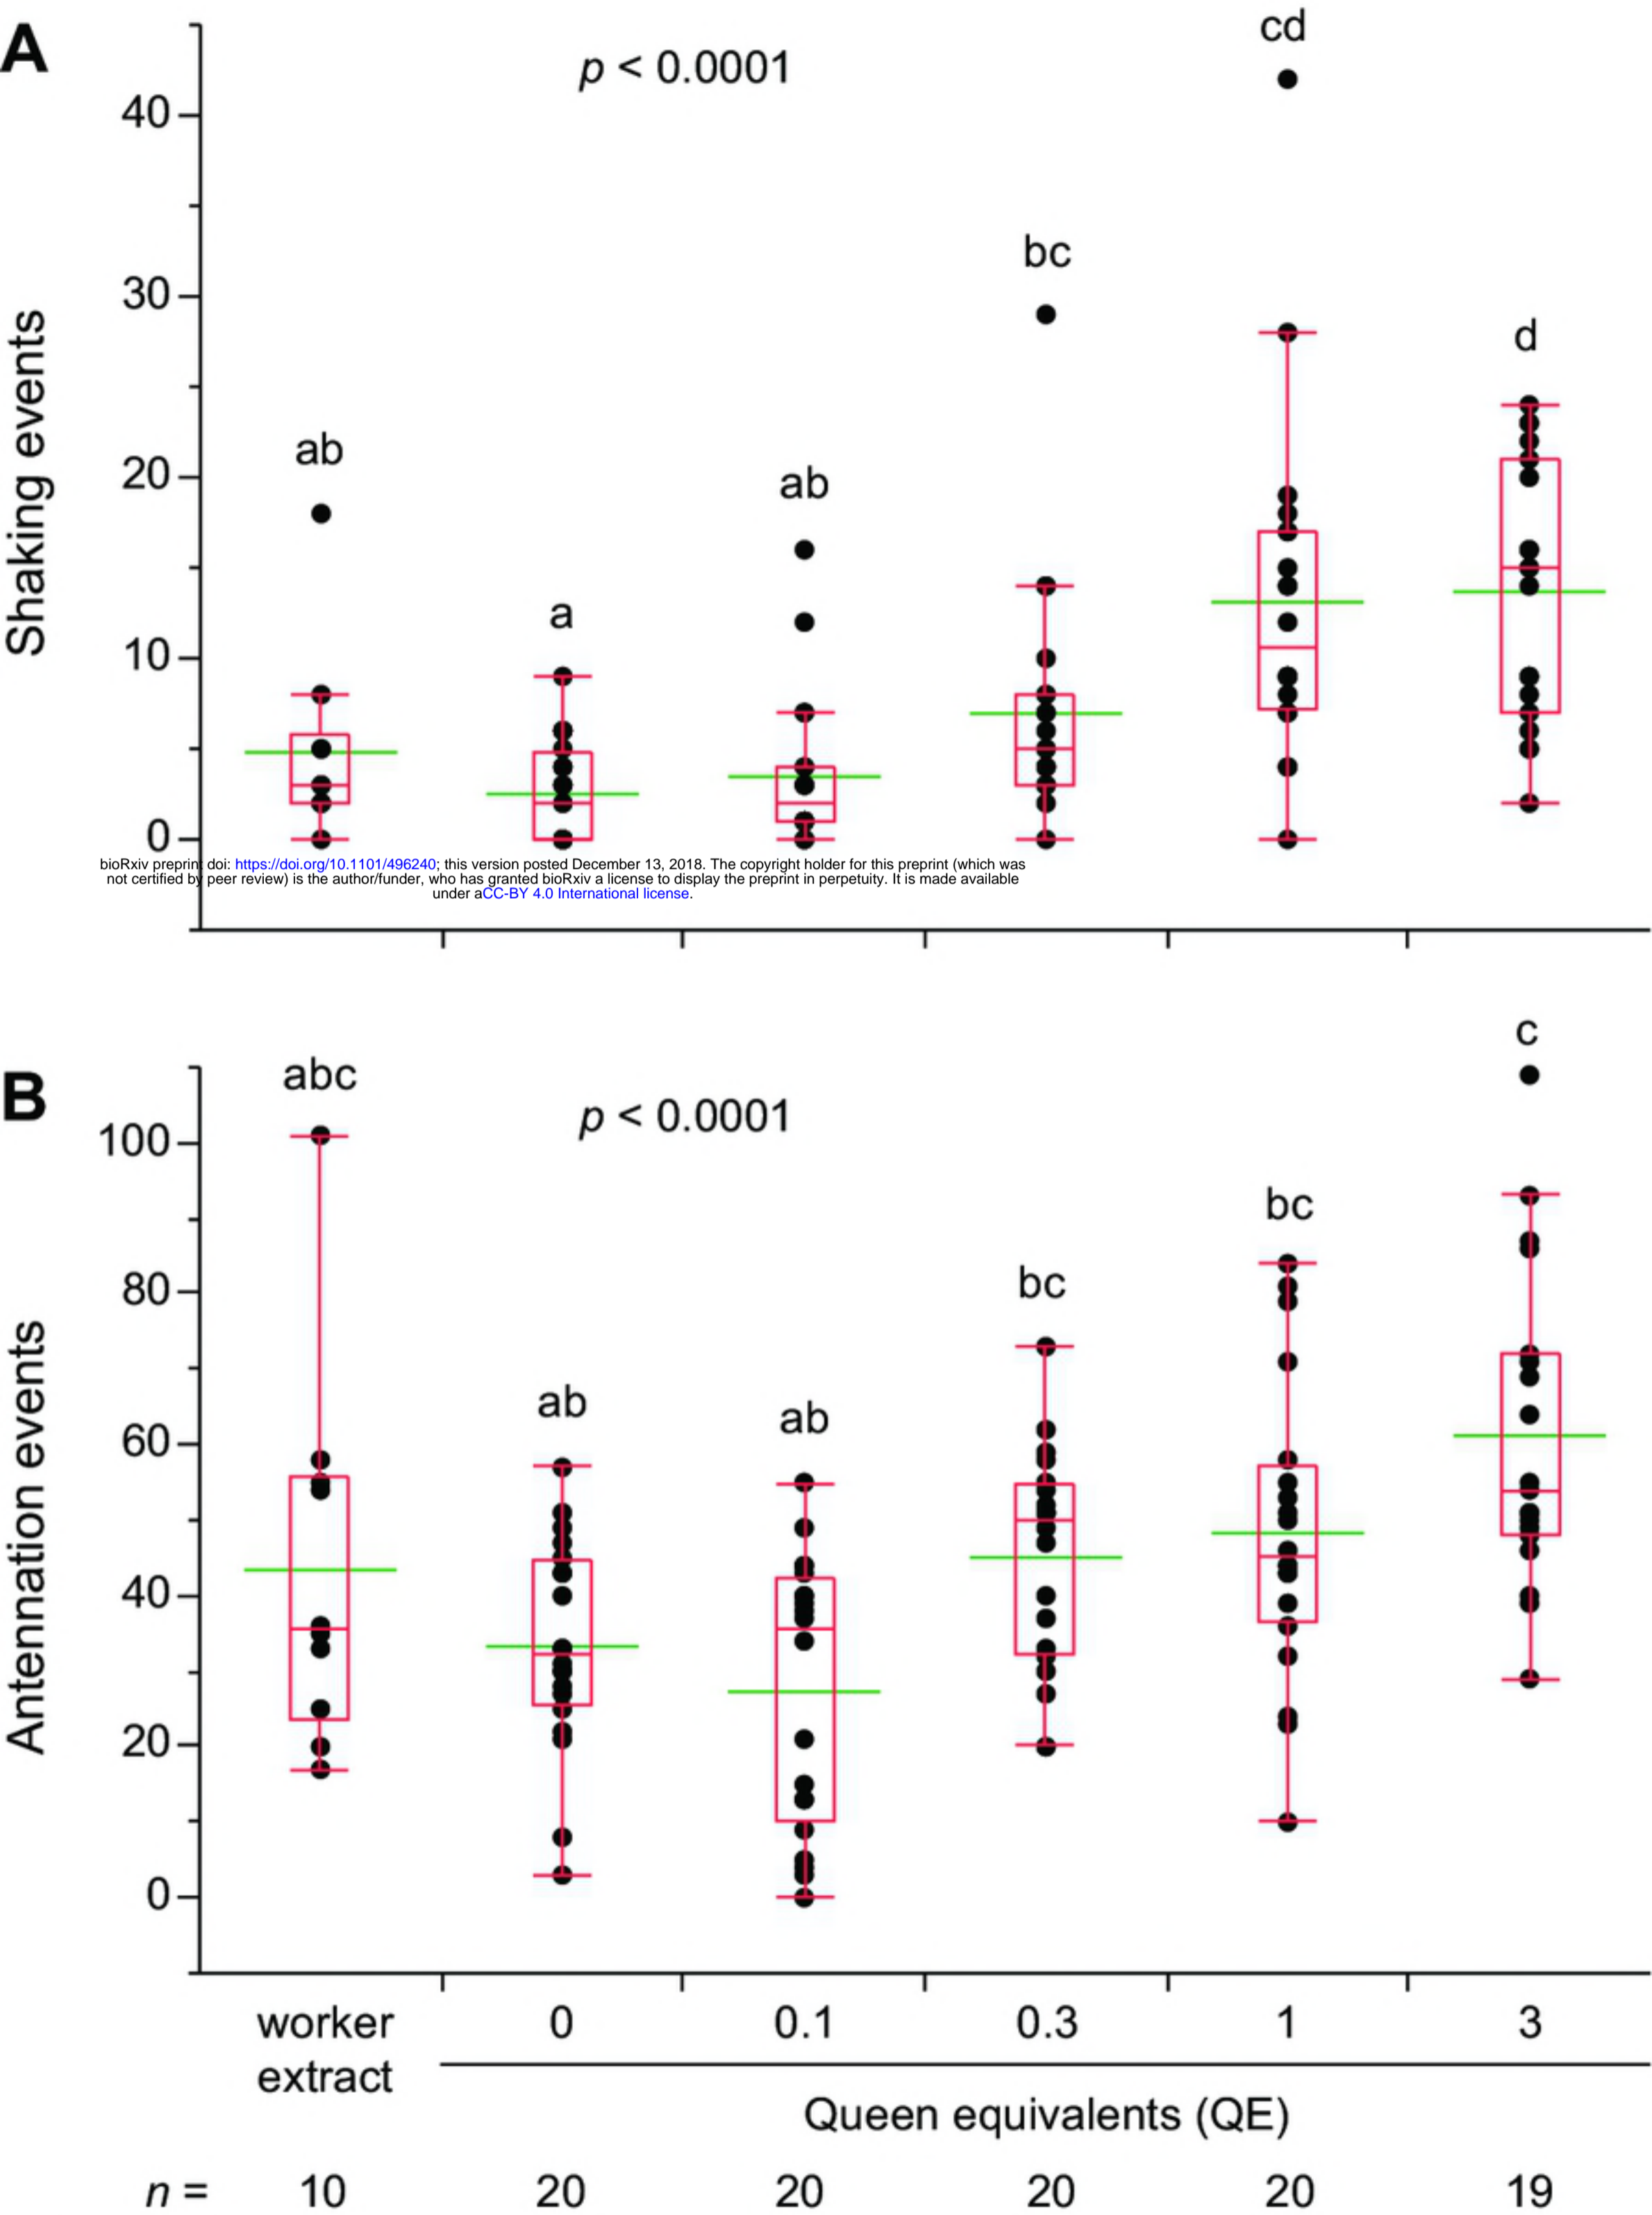

Figure 5

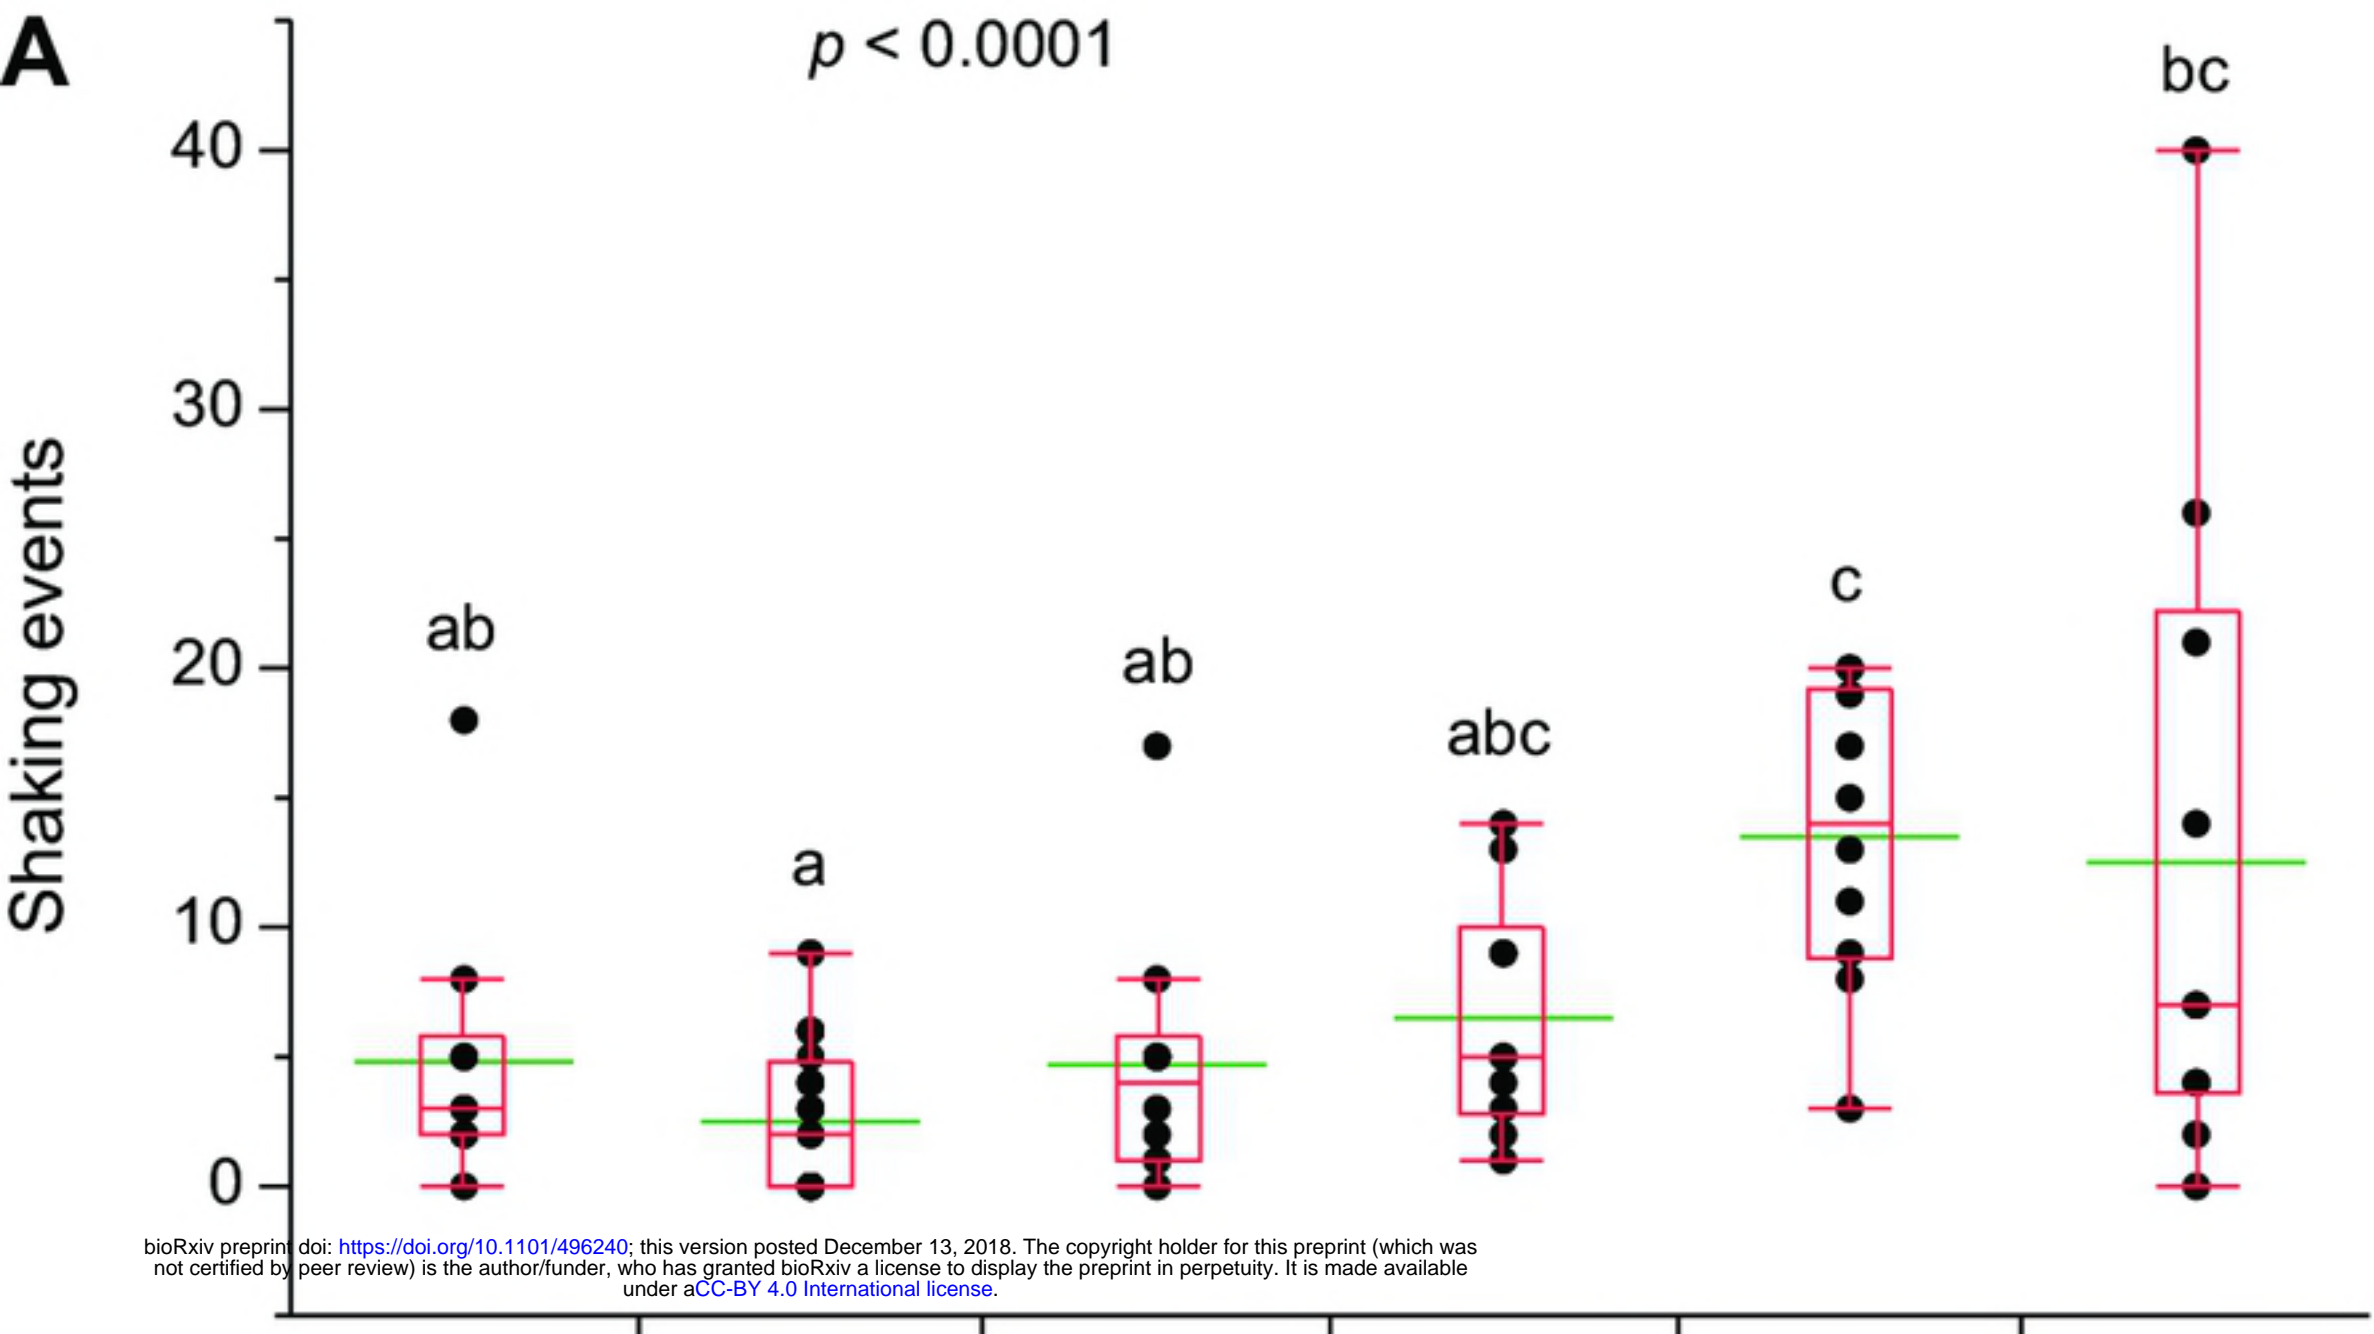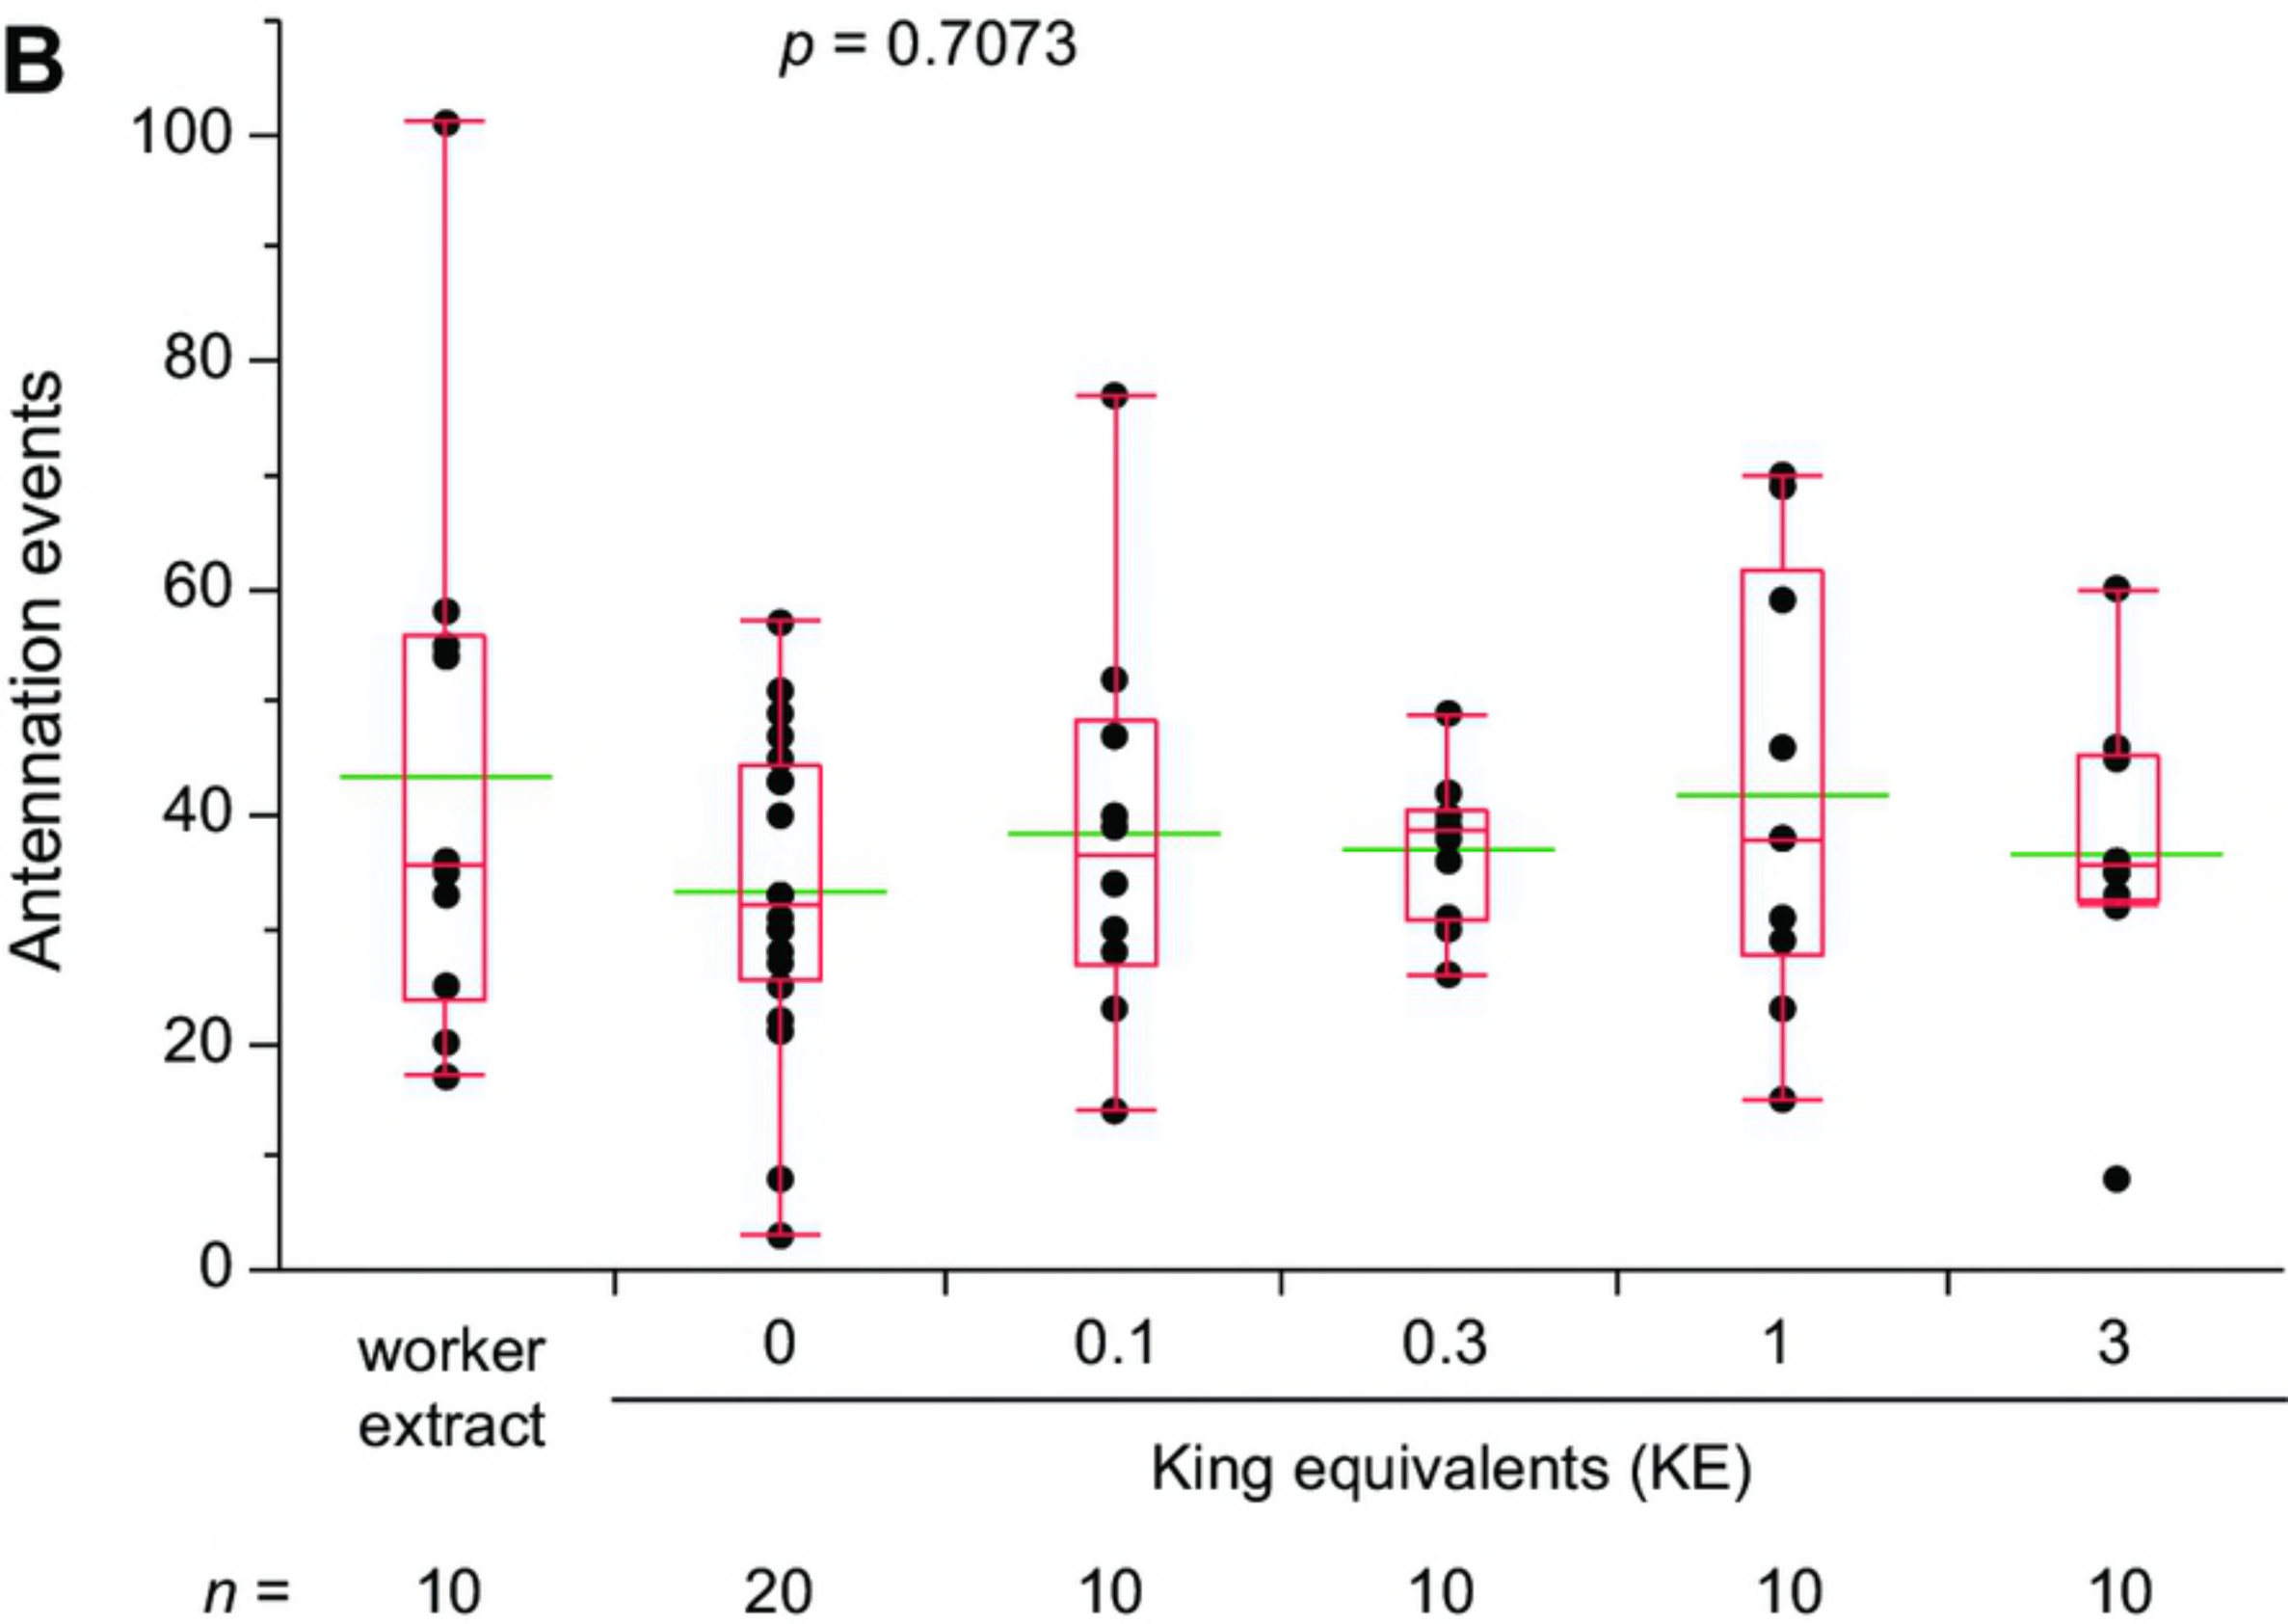

Figure 6

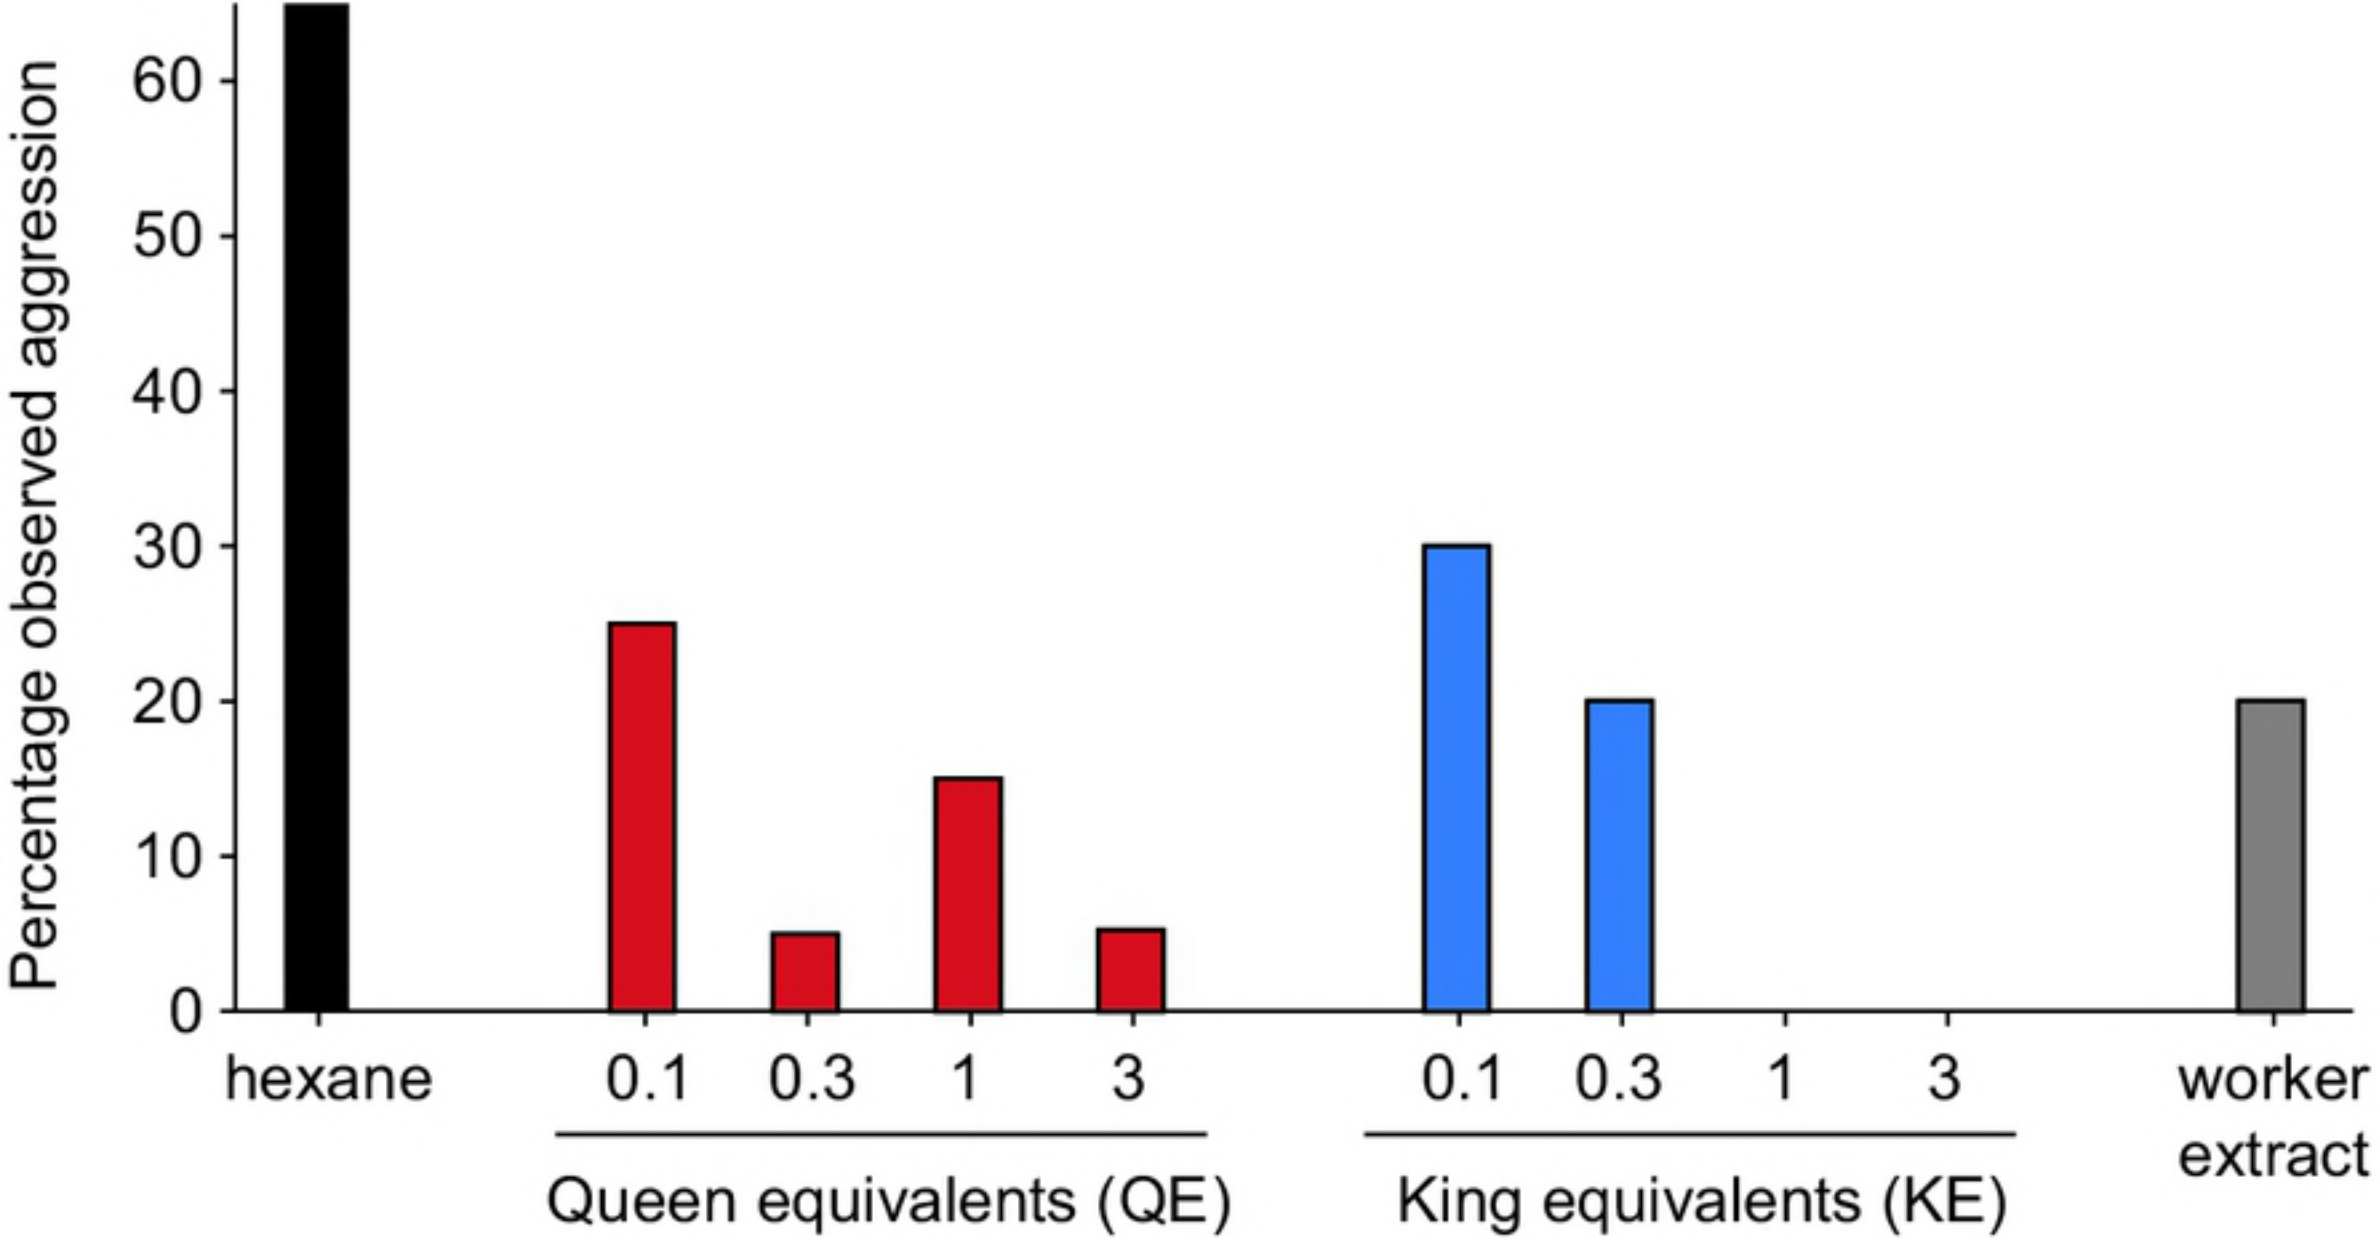

Figure 7
